# Supplementary material for: Evaluation of unmodifiable and potentially modifiable factors affecting peripheral intravenous device-related complications in neonates: a retrospective observational study
Source: PubMed Central journal article supplement — BMJ Open. 2021 Sep 8;11(9):e047788. doi: 10.1136/bmjopen-2020-047788 (PMC8438911; doi:10.1136/bmjopen-2020-047788), 2021-09-08
Supplement: bmjopen-2020-047788.draft_revisions.pdf [file bmjopen-2020-047788.draft_revisions.pdf]

# BMJ Open

BMJ Open is committed to open peer review. As part of this commitment we make the peer review history of every article we publish publicly available.

When an article is published we post the peer reviewers' comments and the authors' responses online. We also post the versions of the paper that were used during peer review. These are the versions that the peer review comments apply to.

The versions of the paper that follow are the versions that were submitted during the peer review process. They are not the versions of record or the final published versions. They should not be cited or distributed as the published version of this manuscript.

BMJ Open is an open access journal and the full, final, typeset and author-corrected version of record of the manuscript is available on our site with no access controls, subscription charges or pay-per-view fees (<http://bmjopen.bmj.com>).

If you have any questions on BMJ Open's open peer review process please email [info.bmjopen@bmj.com](mailto:info.bmjopen@bmj.com)

# BMJ Open

## Evaluation of unmodifiable and potentially modifiable factors affecting peripheral intravenous device related complications in neonates: a retrospective observational study.

|                               |                                                                                                                                                                                                                                                                                                                                                                                                                                                                                                                      |
|-------------------------------|----------------------------------------------------------------------------------------------------------------------------------------------------------------------------------------------------------------------------------------------------------------------------------------------------------------------------------------------------------------------------------------------------------------------------------------------------------------------------------------------------------------------|
| Journal:                      | <i>BMJ Open</i>                                                                                                                                                                                                                                                                                                                                                                                                                                                                                                      |
| Manuscript ID                 | bmjopen-2020-047788                                                                                                                                                                                                                                                                                                                                                                                                                                                                                                  |
| Article Type:                 | Original research                                                                                                                                                                                                                                                                                                                                                                                                                                                                                                    |
| Date Submitted by the Author: | 08-Dec-2020                                                                                                                                                                                                                                                                                                                                                                                                                                                                                                          |
| Complete List of Authors:     | van Rens, Matheus F.P.T.; Hamad Medical Corporation<br>Hugill, Kevin; Hamad Medical Corporation<br>Mahmah, Mohamad A.; Hamad Medical Corporation<br>Bayoumi, Mohammad A.A.; Hamad Medical Corporation<br>Francia, Airene L.V.; Hamad Medical Corporation<br>Garcia, Krisha L.P.; Hamad Medical Corporation<br>Loon, Fredericus HJ; Fontys University of Applied Sciences, Department of Science and Technology in Anesthesia Nursing; Catharina Hospital, Department of Science and Technology in Anesthesia Nursing |
| Keywords:                     | NEONATOLOGY, ANAESTHETICS, Neonatal intensive & critical care < INTENSIVE & CRITICAL CARE, INTENSIVE & CRITICAL CARE                                                                                                                                                                                                                                                                                                                                                                                                 |
|                               |                                                                                                                                                                                                                                                                                                                                                                                                                                                                                                                      |

SCHOLARONE™  
Manuscripts

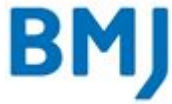

I, the Submitting Author has the right to grant and does grant on behalf of all authors of the Work (as defined in the below author licence), an exclusive licence and/or a non-exclusive licence for contributions from authors who are: i) UK Crown employees; ii) where BMJ has agreed a CC-BY licence shall apply, and/or iii) in accordance with the terms applicable for US Federal Government officers or employees acting as part of their official duties; on a worldwide, perpetual, irrevocable, royalty-free basis to BMJ Publishing Group Ltd ("BMJ") its licensees and where the relevant Journal is co-owned by BMJ to the co-owners of the Journal, to publish the Work in this journal and any other BMJ products and to exploit all rights, as set out in our [licence](#).

The Submitting Author accepts and understands that any supply made under these terms is made by BMJ to the Submitting Author unless you are acting as an employee on behalf of your employer or a postgraduate student of an affiliated institution which is paying any applicable article publishing charge ("APC") for Open Access articles. Where the Submitting Author wishes to make the Work available on an Open Access basis (and intends to pay the relevant APC), the terms of reuse of such Open Access shall be governed by a Creative Commons licence – details of these licences and which [Creative Commons](#) licence will apply to this Work are set out in our licence referred to above.

Other than as permitted in any relevant BMJ Author's Self Archiving Policies, I confirm this Work has not been accepted for publication elsewhere, is not being considered for publication elsewhere and does not duplicate material already published. I confirm all authors consent to publication of this Work and authorise the granting of this licence.

1  
2  
3 **Evaluation of unmodifiable and potentially modifiable factors affecting peripheral**  
4  
5  
6 **intravenous device related complications in neonates: a retrospective observational**  
7  
8 **study.**  
9

10  
11  
12  
13  
14  
15 Matheus F.P.T. van Rens<sup>1</sup>, Kevin Hugill<sup>1</sup>, Mohamad A. Mahmah<sup>1</sup>, Mohammad A.A.  
16  
17 Bayoumi<sup>1</sup>, Airene L.V. Francia<sup>1</sup>, Krisha L.P. Garcia<sup>1</sup>, Fredericus H.J. van Loon<sup>2,3</sup>.  
18  
19

20  
21  
22  
23 **Affiliations:** <sup>1</sup> Neonatal Intensive Care Unit, Women's Wellness and Research Center,  
24  
25 Hamad Medical Corporation, Doha, Qatar; <sup>2</sup> Department of Science and Technology  
26  
27 in Anesthesia Nursing, Fontys University of Applied Sciences, Eindhoven, The  
28  
29 Netherlands; and <sup>3</sup> Department of Anesthesiology, Catharina Hospital, Eindhoven,  
30  
31 The Netherlands.  
32  
33  
34  
35  
36  
37  
38  
39

40 **Address correspondence to:** F.H.J. van Loon. Post to: Fontys University of Applied  
41  
42 Sciences, Department of Technical and Anesthesia Nursing Sciences, Ds. Th.  
43  
44 Fliednerstraat 2, Building TF, 5631 BN Eindhoven, The Netherlands. Email to:  
45  
46 [rick.vanloon@fontys.nl](mailto:rick.vanloon@fontys.nl).  
47  
48  
49  
50

51  
52  
53  
54 **Word count:** 2936  
55  
56  
57  
58  
59  
60

1  
2  
3  
4  
5  
6  
7  
8  
9  
10  
11  
12  
13  
14  
15  
16  
17  
18  
19  
20  
21  
22  
23  
24  
25  
26  
27  
28  
29  
30  
31  
32  
33  
34  
35  
36  
37  
38  
39  
40  
41  
42  
43  
44  
45  
46  
47  
48  
49  
50  
51  
52  
53  
54  
55  
56  
57  
58  
59  
60

For peer review only

## ABSTRACT

**Objectives:** Infants in neonatal units benefit from dependable peripheral intravenous access. However, peripheral intravenous access exposes infants to high rates of clinically minor and serious complications, despite this little is known about the interplay of risk factors. The aim of this study was to assess the incidence and evaluate the interactions of risk factors on the occurrence of peripheral intravenous complications in a neonatal population. **Design:** This was a retrospective observational study. **Setting:** The study was performed on the NICU. **Participants:** This study included 12978 neonates who required intravenous therapy. **Outcome measurements:** The main outcome was the occurrence of any complication in relation to PIVC use, leading to unplanned removal of the device before completion of the intended intravenous therapy. **Results:** A mean dwell time of  $36\pm 28$  hours was recorded in participants with no complications, whereas the mean dwell time was  $31\pm 243$  hours in participants with an indication for premature removal of the PIVC ( $P<0.001$ ,  $t=11.35$ ). Unplanned removal occurred in 59% of cases, the overall complication rate was 18 per 1000 catheter days. Unmodifiable factors affecting PIVC dwell time include lower birth ( $P<0.001$ ,  $t=5.49$ ) and current body weight ( $P<0.001$ ,  $t=5.51$ ). Cannulation site ( $P<0.001$ ,  $\chi^2=69.00$ ,  $df=6$ ), the inserted device ( $P<0.001$ ,  $\chi^2=99.51$ ,  $df=3$ ) and the indication for IV treatment ( $P<0.001$ ,  $\chi^2=409.12$ ,  $df=4$ ) were modifiable factors. **Conclusions:** Most infants experienced a vascular access related complication. Given

1  
2  
3 the high complication rate, PIVC should be used judiciously and thought given prior to  
4  
5  
6 their use as to whether alternate means of IV access might be more appropriate.  
7  
8  
9  
10  
11

### 12 **Strengths and limitations of this study**

- 15 • This was an observational study including a large sample of 12978 neonates.
  - 17 • This study provide information on the risk of complications regarding peripheral  
18 intravenous cannulation in neonates.
  - 20 • This study is based on a retrospective analyses of collected data.
- 21  
22  
23  
24  
25  
26  
27  
28  
29  
30  
31  
32  
33  
34  
35  
36  
37  
38  
39  
40  
41  
42  
43  
44  
45  
46  
47  
48  
49  
50  
51  
52  
53  
54  
55  
56  
57  
58  
59  
60

## INTRODUCTION

Providing reliable vascular access in the neonatal intensive care unit (NICU) is essential to administer nutrition, fluids, medication, and blood products.<sup>1</sup> Critically ill and preterm infants benefit from early intravenous therapy.<sup>2</sup> Currently the main intravenous (IV) vascular access routes, are via peripheral and central veins. Peripheral intravenous cannulation is the most frequently performed procedure in NICU.<sup>1,3</sup> Preterm and ill infants are at an increased risk of peripheral intravenous catheter (PIVC) related complications.<sup>1,3-6</sup> In part, this is due to immature skin anatomy and physiology, immature immune system and smaller fragile blood vessels.<sup>3-6</sup>

PIVC related complications are a major clinical concern in NICUs. Frequently encountered complications are infiltration and extravasation (PIVIE), leakage, occlusion, thrombosis, phlebitis, infection, and dislodgment or accidental removal.<sup>1,4,7-</sup>

<sup>11</sup> According to Pettit<sup>12</sup>, the incidence of complications has remained constant over recent decades irrespective of clinical innovations and changes in practice. Overall, the risk for a PIVC related complication in this patient population is reported as up to 75%.<sup>1,5,6,8,11,13</sup> Of particular concern is the risk of PIVIE which according to several sources is high in the neonatal population, having an incidence of around 65%.<sup>1,4,8,12</sup> Infection rates are highly variable, but have been documented as between 2 to 49 incidents per 1000 catheter days.<sup>14</sup>



1  
2  
3  
4 Extrinsic modifiable factors influence PIVC dwell time, such as clinician training,  
5  
6 exposure, experience, choice of the optimal PIVC for the right patient for the right  
7  
8 therapy, site selection and preparation, insertion technology, maintenance care  
9  
10 bundles, stabilization materials and dressings.<sup>3-5,15</sup> Recent evidence from large scale  
11  
12 studies in neonatal populations regarding factors influencing PIVC is lacking and  
13  
14 absent for Middle Eastern settings and contexts. The current study aims to identify and  
15  
16 evaluate the relationships between unmodifiable and potentially modifiable factors with  
17  
18 the presence of PIVC related complications.  
19  
20  
21  
22  
23  
24  
25  
26  
27  
28  
29  
30  
31  
32  
33  
34  
35  
36  
37  
38  
39  
40  
41  
42  
43  
44  
45  
46  
47  
48  
49  
50  
51  
52  
53  
54  
55  
56  
57  
58  
59  
60

## METHODS

### Design and setting

This retrospective observational study uses routinely collected anonymized data from January 2019 to July 2020. The outcome of interest was the occurrence of any complication in relation to PIVC use, leading to unplanned removal of the device before completion of the intended intravenous therapy. The study was carried out on the NICU (112 cots) of the Women's Wellness and Research Centre (WWRC) of Hamad Medical Corporation (HMC), Doha, Qatar. The study protocol (MRC-01-20-594) was approved by the local institution review body (IRB). As the data source was anonymized, the local IRB deemed that participant consent was not feasible nor required as they determined the study a 'chart review'. Participants and their parents were not involved in the design, conduct or reporting of this study.

### Participants and sample size

Infants who were admitted to the NICU and who required intravenous therapy were included in this study. Participants were excluded from the sample if the data collection was incomplete or related to the use of other devices (centrally inserted central catheters or peripherally inserted central catheters).

### Procedure

1  
2  
3  
4 Peripheral intravenous cannulation was performed according to hospital policy based  
5  
6 on international guidelines.<sup>16</sup> In the study setting peripheral intravenous cannulation is  
7  
8 routinely performed by nurses from the NICU vascular access team (VAT). The  
9  
10 selection of suitable veins was done using the VeinViewer® (Christie Medical Holdings  
11  
12 Inc., Lake Mary, FL, USA) with the saphenous and elbow veins generally avoided. Vein  
13  
14 length, valves, and potential for the vein to fill and empty itself were prior assessed  
15  
16 using a standardized approach to appraisal of the potential site. Short peripheral  
17  
18 intravenous catheters were used if therapy was predicted for up to two days, including  
19  
20 a 26 or 24-gauge Neoflon™ Pro (Becton Dickinson Infusion Therapy, Sandy, UT, USA)  
21  
22 or a 26-gauge SuperCath™ Safety (ICU Medical, San Clemente, CA, USA). Extended  
23  
24 22-gauge peripheral intravenous catheters were inserted when duration of therapy was  
25  
26 expected to last for 5 days (LeaderFlex, Vygon, Lansdale, PA, USA). In situations  
27  
28 where intravenous therapy was expected to last more than 5 days central venous  
29  
30 access is preferred.  
31  
32  
33  
34  
35  
36  
37  
38  
39  
40  
41  
42  
43

#### 44 **Measurements and data collection**

45  
46 Patients demographics and baseline data included sex, gestational age at birth in  
47  
48 weeks and days, birth weight, and current body weight in grams. Data regarding the  
49  
50 procedure of peripheral intravenous cannulation were the date and time of cannulation,  
51  
52 as well as the number of attempts needed to successful cannulation, cannulation side  
53  
54 (left or right), extremity of cannulation and the site on the extremity (dorsum of the  
55  
56 hand, wrist and lower arm, elbow crease and upper arm, foot, ankle and lower leg, or  
57  
58  
59  
60

1  
2  
3  
4 knee and upper leg), size of device (22, 24, or 26 gauge), the indication for intravenous  
5  
6 treatment (intravenous fluids, medications, total parenteral nutrition, blood and blood  
7  
8 products, blood extraction, or procedural), the date and time of removal of the PIVC,  
9  
10 total dwell time of the PIVC in hours (calculated as the removal date and time minus  
11  
12 the insertion date and time), and the reason for removal of the PIVC (therapy  
13  
14 completed and elective removal, PIVIE, phlebitis, occlusion, dislodgement and  
15  
16 accidental removal, discoloration, patient transferred or expired). Furthermore,  
17  
18 additional data points included the use of catheter securement glue, application of  
19  
20 ivWatch® (ivWatch LLC., Newport News, VA, USA), if the touch-look-compare  
21  
22 observation tool was used, and calculation of the PIVIE Severity Score in  
23  
24 percentages.<sup>17,18</sup> The ivWatch® was introduced into use in January 2020 and applied  
25  
26 since then with infants weighing more than 1000 grams.  
27  
28  
29  
30  
31  
32  
33  
34  
35  
36  
37  
38  
39  
40

### 41 42 43 44 45 46 47 48 49 50 51 52 53 54 55 56 57 58 59 60

**Statistical analyses**

Descriptive statistics were used to summarize the outcomes with a mean and its standard deviation or median and its range for continuous variables regarding its normal distribution, and absolute numbers with percentage for discrete variables. The assumption of normal distribution was proved with Kolmogorov-Smirnof testing. Differences regarding outcomes and measurements were demonstrated by using the  $\chi^2$ -test, Mann-Whitney  $U$  test, or unpaired samples  $t$  test, as appropriate. Stepwise multivariate logistic regression analyses were used to provide correlations between variables regarding the outcome of interest and obtain its odds ratio with 95%

1  
2  
3 confidence interval. Items with a significant relationship ( $P < 0.01$ ) to the outcome of  
4  
5 interest from a univariate logistic regression technique were entered in these analyses.  
6  
7  
8 The stepwise method was utilized to remove independent variables that did not make  
9  
10 a significant contribution to the primary outcome variable using a backward elimination  
11  
12 process based on the Wald statistic and level of significance, with the removal criteria  
13  
14 set at  $P = 0.01$ , to obtain a model with a minimal set of variables and a maximal  
15  
16 correlation coefficient (Nagelkerke  $R^2$ ). Correlation between variables was measured  
17  
18 by determining Pearson's or Spearman's  $\rho$ , as appropriate. Survival analyses of the  
19  
20 PIVC in terms of its dwell time were performed by plotting a Kaplan-Meier curve.  
21  
22 Differences between survival time of the PIVC according to its reason for premature  
23  
24 removal were represented with Mantel-Cox  $\chi^2$ . A  $P < 0.05$  was denoted to be statistically  
25  
26 significant throughout this study. SPSS (version 25.0; SPSS Inc., Chicago, IL, USA)  
27  
28 was used for statistical analyses.  
29  
30  
31  
32  
33  
34  
35  
36  
37  
38  
39  
40  
41  
42  
43  
44  
45  
46  
47  
48  
49  
50  
51  
52  
53  
54  
55  
56  
57  
58  
59  
60

## RESULTS

In total, data on 15087 cannulation events in neonates was collected during the study period, of which data of 2109 participants were removed due to incompleteness, including failure to insert. The final database included 12978 participants, with 7695 (59%) being of male sex. Mean duration of gestation was 34+6 weeks. Current age in days after birth was 9 (0 to 29) days at the time that peripheral intravenous cannulation was performed. Mean weight at birth was 2334±975 grams, with a mean current weight of 2410±931 grams at the time of cannulation.

Successful peripheral intravenous cannulation at the first attempt was obtained in 8481 participants (65%). 24% needed two attempts, 8%, 2% needed three attempts and a small number, under senior clinician oversight needed more attempts to successfully insert a PIVC. Throughout the study were 19329 insertion attempts performed to create peripheral intravenous access. Data regarding the procedure of peripheral intravenous cannulation is summarized in Table 1.

Failure of the PIVC, resulting in premature removal, occurred in 7627 participants (59%). In 5145 participants (40%), the PIVC was removed after completion of intravenous therapy. In 142 cases (1%) was the participant transferred or expired (administrative censoring). A mean dwell time of 36±28 hours was recorded in participants with no complications, whereas the mean dwell time was 31±243 hours in participants with an indication for premature removal of the PIVC ( $P<0.001$ ,  $t=11.350$ ).

1  
2  
3 Subsequently, there was a correlation between dwell times and the occurrence of a  
4  
5 PIVC related complication ( $P<0.001$ ,  $\rho=-0.099$ ). The overall PIVC complication rate  
6  
7 was 18 per 1000 catheter days. Additional information according to the reason for  
8  
9 removal of the PIVC is shown in Table 2.  
10  
11  
12

13  
14 Total dwell time of the device in each participant until its moment of removal is  
15  
16 represented in Figure 1. 50% of PIVC were removed within the first 38 hours. Dwell  
17  
18 times differed regarding the reason for removal or the kind of PIVC related complication  
19  
20 ( $P<0.001$ ,  $\chi^2=76.834$ ,  $df=4$ ).  
21  
22  
23

24  
25 As shown in Table 3, twelve variables had a significant relation with the outcome of  
26  
27 interest in the univariate logistic analyses, resulting in premature removal of the device.  
28  
29 These items were used for multivariate analyses, resulting in a smallest set of five  
30  
31 variables correlating with the outcome of interest ( $R^2=60\%$ ) (Table 4).  
32  
33  
34

35  
36 A lower weight at birth ( $P<0.001$ ,  $t=5.486$ ) and a lower current body weight ( $P<0.001$ ,  
37  
38  $t=5.508$ ) resulted in an increased risk for PIVC related complications. Cannulation on  
39  
40 the hand showed the lowest complication rate (57%), whereas most complications  
41  
42 were reported after cannulation on the ankle or lower leg (72%) ( $P<0.001$ ,  $\chi^2=69.001$ ,  
43  
44  $df=6$ ). Inserting a 22-gauged device resulted in 77% of cases in a complication,  
45  
46 cannulation with a 26-gauged catheter lead to complications in 49% of insertions  
47  
48 ( $P<0.001$ ,  $\chi^2=99.513$ ,  $df=3$ ). If TPN was the indication for starting up intravenous  
49  
50 treatment, 64% resulted in premature removal of the device, whereas only 18% of  
51  
52 insertion resulted in a complication if cannulation was performed per procedure and  
53  
54 elective ( $P<0.001$ ,  $\chi^2=409.120$ ,  $df=4$ ).  
55  
56  
57  
58  
59  
60

1  
2  
3 The PIVIE Severity Score was higher in participants with an indication for premature  
4 removal of the device ( $13.1\pm 8.6$ ) when compared to those without a VAD related  
5 complication ( $0.8\pm 4.1$ ) ( $P<0.001$ ,  $t=-25.409$ ). PIVIE Severity Scores were increased  
6 in participants suffering from PIVIE ( $13.8\pm 8.0$ ) and phlebitis ( $12.9\pm 9.9$ ). Furthermore,  
7 a correlation between the PIVIE Severity Score and device dwell time could be  
8 obtained ( $P<0.001$ ,  $\rho=-0.122$ ). The ivWatch® was applied in 12% of participants, of  
9 which 63% suffered from premature removal. The added value of this device resulted  
10 in a sensitivity of 57% and a specificity of 56% ( $P<0.001$ ,  $\chi^2=54.165$ ,  $df=1$ ). Catheter  
11 dwell times of  $33\pm 22$  were seen after the application of ivWatch®, which did not differ  
12 from dwell times of  $33\pm 25$  in participants in whom the technique was not used  
13 ( $P=0.705$ ,  $t=-0.379$ ). Moreover, a correlation between the application of the ivWatch®  
14 and device dwell times could not be obtained ( $P=0.705$ ,  $\rho=-0.006$ ). The touch-look-  
15 compare observation tool was applied in 67% of cases and detected complications in  
16 61% of participants with an event ( $P=0.002$ ,  $\chi^2=9.975$ ,  $df=1$ ). The use of the touch-  
17 look-compare observation tool resulted in a sensitivity of 97% and a specificity of 96%  
18 and correlated with device dwell time ( $P=0.001$ ,  $\rho=-0.032$ ). The use of glue for fixation  
19 of the PIVC increased the dwell time to  $34\pm 25$  when compared to participants in which  
20 no glue was used (dwell time of  $28\pm 18$ ), although the difference was not significant  
21 ( $P=0.057$ ,  $t=-1.902$ ). A correlation could not be seen between the use of glue and PIVC  
22 dwell times ( $P=0.025$ ,  $\rho=-0.106$ ).  
23  
24  
25  
26  
27  
28  
29  
30  
31  
32  
33  
34  
35  
36  
37  
38  
39  
40  
41  
42  
43  
44  
45  
46  
47  
48  
49  
50  
51  
52  
53  
54  
55  
56  
57  
58  
59  
60



## DISCUSSION

The incidence of VAD failure is high in clinical practice, which negatively affects a neonate's comfort and outcome.<sup>19-21</sup> Failure of peripheral inserted PIVC, resulting in premature removal, occurred in 51% of participants, with a complication rate of 18 per 1000 device days. The most frequently reported complications were PIVIE and phlebitis. The risk for complications was increased in participants with a lower weight at birth and current body weight. Furthermore, the cannulation site, size and type of device, and the indication for intravenous treatment affected the risk for failure as well.

Although this study provide information on the risk of complications regarding peripheral intravenous cannulation in neonates, majority of it was reported in many articles. Nonetheless, to the best of our knowledge, a study including as many patients as the current study does was never published before on this topic.

Peripheral intravenous catheters are often the primary and most commonly inserted devices used to obtain vascular access during hospitalization.<sup>19</sup> The incidence of device failure in the current study is slightly higher when compared to the 34% pooled incidence of failure in the recently published meta-analyses by Indarwati et al.<sup>21</sup> It is difficult to give an unambiguous clarification for this, although the pattern of complications and their relative incidence does match.

PIVIE was the most common complication in infants admitted to the NICU, with an incidence of 34% in the current study. PIVIE is defined as an unintended infusion of

1  
2  
3 fluids and/or medication in the surrounding tissue, in which infiltration is the infusion of  
4  
5 non-vesicant fluids or medication and extravasation infusion of vesicants into  
6  
7 surrounding tissues.<sup>5</sup> The determination of PIVIE can be subjective, making it hard to  
8  
9 compare the results of different studies. However, standardized training of a dedicated  
10  
11 VAT and routine review of scores can improve consensus and reduce subjectivity. The  
12  
13 incidence of infiltration reported elsewhere ranges from 6% to 87%, and the incidence  
14  
15 of extravasation between 2% and 77%.<sup>21</sup> The use of the infiltration/extravasation  
16  
17 staging instrument, as developed by Montgomery et al., could accomplish consensus  
18  
19 on the definition of the condition and its severity.<sup>5,22</sup> An explanation for the non-  
20  
21 standard use of this instrument may be that it has not been externally validated.  
22  
23  
24  
25  
26  
27  
28  
29

30 Phlebitis (inflammation of the venous wall) can cause discomfort and tissue damage.  
31  
32 The incidence was 10% in the current study which is broadly in accord with other  
33  
34 reports.<sup>21,22-26</sup> According to Arias-Fernandez et al., assessment of phlebitis is difficult  
35  
36 because the consensus for the diagnosis is low.<sup>27</sup> Furthermore, a lack of consensus  
37  
38 on phlebitis measures has likely contributed to disparities in reported phlebitis  
39  
40 incidence.<sup>28</sup>  
41  
42  
43  
44  
45

46 Several tools are used in clinical practice to reduce the risk or severity for premature  
47  
48 failure of PIVCs due to device related complications. The touch-look-compare  
49  
50 observation tool was developed at Cincinnati Children's Hospital Medical Center to  
51  
52 reduce peripheral intravenous infiltration and extravasation injuries.<sup>17</sup> This  
53  
54 documented methodical hourly assessment of patients with a PIVC can help  
55  
56 practitioners' standardize their practice and reduce variations in quality of care.<sup>17</sup> Our  
57  
58  
59  
60

1  
2  
3 study showed highly discriminative effects of the touch-look-compare observation tool  
4  
5  
6 based on high sensitivity and specificity, which was denoted as the most decisive tool  
7  
8  
9 in detecting device related complications in earlier. Routine observations by combining  
10  
11 the touch-look-compare observation tool and the PIVIE Severity Scoring instrument  
12  
13  
14 seems to result in the most optimal situation regarding the early detection of  
15  
16 complications.  
17

18  
19 It is known that the preferred cannulation site is the dorsal hand, on which fewer  
20  
21 attempts were required for successful cannulation, with fewer complications and  
22  
23 extended dwell times.<sup>13</sup> This is in accordance with the results of the current study.  
24  
25  
26 Moreover, phlebitis caused by mechanical irritation due to the device is thought to be  
27  
28 an important factor for failure.<sup>20</sup> Fixation of the device after insertion with glue increases  
29  
30 the stability of the device. Despite no significance could be obtained, dwell times were  
31  
32 increased after using glue in this study. Highest incidence of premature removal of the  
33  
34 device was seen with a 22-gauged device. Insertion of a 26-gauged catheter resulted  
35  
36 in the lowest incidence of complications. Notwithstanding, most participants in this  
37  
38 study received a 26-gauged device, possibly leading to a distorting result. To minimize  
39  
40 the risk for phlebitis, the smallest gauged catheter possible should be inserted and the  
41  
42 use of extension tubes as an accessory to the device should be avoided.<sup>26</sup>  
43  
44  
45  
46  
47  
48  
49

50  
51 Preterm infants are extra sensitive to the development of PIVIE and phlebitis due to  
52  
53 their immature immune systems.<sup>21,29</sup> Beall et al. concluded that the inadequate anti-  
54  
55 inflammatory response may fail to release free radical scavengers leading to  
56  
57 endothelial apoptosis and injury of cell membranes and vessels.<sup>29</sup> To add to this, it is  
58  
59  
60

1  
2  
3 thought that medications or fluids with a higher osmolality increases the risk for  
4  
5  
6 extravasation by irritating the endothelial lining of the vein.<sup>21</sup> Early detection of signs  
7  
8  
9 and symptoms correlating positively with PIVC complications is crucial in limiting the  
10  
11  
12 risk for failure of the device. Assessing pain accurately in preverbal infants is  
13  
14 challenging.<sup>30</sup> Moreover, additional occlusive fixtures and bandages to secure the  
15  
16  
17 device add limits to identifying early stages of complications, and thus timely cessation  
18  
19  
20 of therapy and treatment to minimize harm.<sup>21,30</sup> The incidence of complications could  
21  
22  
23 likely be reduced with consistent and quality insertion and maintenance practices. The  
24  
25  
26 Infusion Nurses Society provides specific recommendations for newborn infants  
27  
28  
29 offering further specific guidelines for insertion and management practice.<sup>16</sup>  
30  
31  
32

### 33 **Limitations**

34  
35  
36 The current study was based on a retrospective collected dataset. In contrast to  
37  
38  
39 randomized studies, the method creates a risk for selection bias. In the present study  
40  
41  
42 every infant with a PIVC was included in order to minimize the risk of selection bias. In  
43  
44  
45 addition, this current study was carried out according to the STROBE statement.<sup>31</sup>  
46  
47  
48 Inter-rater variability might have affected the results, however, our use of standardized  
49  
50  
51 education and training and limiting vascular access to a small team (the VAT) will  
52  
53  
54 mitigate this variability in the data. Nonetheless, future research should focus on the  
55  
56  
57 development and validation of decisive tools and their integration with emerging  
58  
59  
60 technologies to identify complications early.

## CONCLUSION AND RELEVANT IMPLICATIONS

Five variables were identified as factors affecting PIVC dwell time in patients admitted to the NICU. These factors include a lower weight at birth and current body weight, the cannulation site, size and type of device and the indication for intravenous treatment affected the risk for failure as well. The PIVC complication rate was 18 per 1000 catheter days in the current study. The risk for the development of a PIVC related complication, leading to premature removal of the device, increased with extended dwell times. It seems that when a PIVC is inserted it is not the question of if the infant will have a complication, but only a matter of when. Consequently, we argue that PIVC should be used judiciously and thought given prior to their use as to whether alternate means of IV access might be more appropriate.

## ADDITIONAL INFORMATION

**Conflicts of interest disclosures:** The authors declared no potential conflicts of interest with respect to the research, authorship, and/or publication of this article.

**Funding:** The authors received no financial support for the research or authorship. The local IRB made funds available to support open publication of this article.

**Data sharing statement:** De-identified individual participant data will not be made available.

**Acknowledgements:** The authors would like to thank the NICU's vascular access team and all our other colleagues in the NICU of WWRC.

**Contributor's statement:** Matheus F.P.T. van Rens was the main investigator, conceptualized and designed the study, coordinated and supervised data collection, drafted the initial manuscript, and reviewed and revised the manuscript. Kevin Hugill drafted the initial manuscript, and reviewed and revised the manuscript. Mohamad A. Mahmah critically reviewed the manuscript for important intellectual content. Mohammad A.A. Bayoumi reviewed and revised the manuscript. Airene L.V. Francia

1  
2  
3 designed the data collection instruments, collected data, and reviewed and revised the  
4  
5  
6 manuscript. Krishna L.P. Garcia designed the data collection instruments, collected  
7  
8 data, and reviewed and revised the manuscript. Fredericus H.J. van Loon  
9  
10  
11 conceptualized and designed the study, carried out the initial analyses, and critically  
12  
13  
14 reviewed the manuscript for important intellectual content and revised the manuscript.  
15  
16  
17  
18  
19  
20  
21  
22  
23  
24  
25  
26  
27  
28  
29  
30  
31  
32  
33  
34  
35  
36  
37  
38  
39  
40  
41  
42  
43  
44  
45  
46  
47  
48  
49  
50  
51  
52  
53  
54  
55  
56  
57  
58  
59  
60

For peer review only

## REFERENCES

1. Legemaat M, Carr PJ, van Rens RM, et al. Peripheral intravenous cannulation: complication rates in the neonatal population: a multicenter observational study. *J Vasc Access* 2016;17(4):360-65.
2. Ainsworth S, McGuire W. Percutaneous central venous catheters versus peripheral cannulae for delivery of parenteral nutrition in neonates. *Cochrane Database Syst Rev* 2015;(10):CD004219.
3. Chenoweth KB, Guo J-W, Chan B. The extended dwell peripheral intravenous catheter is an alternative method of NICU intravenous access. *Adv Neonatal Care* 2018;18(4):295-301.
4. Odom B, Lowe L, Yates C. Peripheral Infiltration and extravasation injury methodology: a retrospective study. *J Infus Nurs* 2018;41(4):247-52.
5. Atay S, Sen S, Cukurlu D. Incidence of infiltration/extravasation in newborns using peripheral venous catheter and affecting factors. *Rev Esc Enferm USP*. 2018;52:e03360.
6. Unbeck M, Förberg U, Ygge B-M, et al. Peripheral venous catheter related complications are common among paediatric and neonatal patients. *Acta Paediatr* 2015;104(6):566-74.
7. Patregnani JT, Sochet AA, Klugman D. Short-term peripheral vasoactive infusions in pediatrics: where is the harm? *Pediatr Crit Care Med* 2017;18(8):e378-e81.
8. Danski MTR, Mingorance P, Johann DA, et al. Incidence of local complications and risk factors associated with peripheral intravenous catheter in neonates. *Rev Esc Enferm USP*. 2016;50(1):22-8.
9. Boyar V, Galiczewski C, Kurepa D. Point-of-care ultrasound use in neonatal peripheral intravenous extravasation injuries: a case series. *J Wound, Ostom* 2018;45(6):503-9.
10. Desarno J, Sandate I, Green K, et al. When in doubt, pull the catheter out: implementation of an evidence-based protocol in the prevention and management



- of peripheral intravenous infiltration/extravasation in neonates. *Neonatal Netw* 2018;37(6):372-7.
11. Ohki Y, Maruyama K, Harigaya A, et al. Complications of peripherally inserted central venous catheter in Japanese neonatal intensive care units. *Pediatr Int* 2013;55(2):185-9.
12. Pettit J. Assessment of the infant with a peripheral intravenous device. *Adv Neonatal Care* 2003;3(5):230-40.
13. Monasor-Ortolá D, Cortés-Castell E, Martínez-Pascual C, et al. Factors influencing the success of peripheral venous access in neonates. *J Pediatr Nurs* 2019;47:e30-e5.
14. Wu J, Mu D. Vascular catheter-related complications in newborns. *J Paediatr Child Health* 2012;48(2):E91-5.
15. Rickard CM, Marsh NM, Webster J, et al. Intravascular device administration sets: replacement after standard versus prolonged use in hospitalised patients-a study protocol for a randomised controlled trial (The RSVP Trial). *BMJ Open* 2015;5(2):e007257.
16. Gorski LA, Hadaway L, Hagle M, et al. 2016 Infusion therapy standards of practice. *J Infus Nurs* 2016;39(1 Suppl.):S1-S159.
17. Tofani BF, Rineair SA, Gosdin CH, et al. Quality improvement project to reduce infiltration and extravasation events in a pediatric hospital. *J Pediatr Nurs* 2012;27(6):682-9.
18. Doellman D, Hadaway L, Bowe-Geddes LA, et al. Infiltration and extravasation: update on prevention and management. *J Infus Nurs* 2009;32(4):203-11.
19. Alexandrou E, Ray-Barruel G, Carr PJ, et al. Use of Short peripheral intravenous catheters: characteristics, management, and outcomes worldwide. *J Hosp Med* 2018;13(5).
20. Takahashi T, Murayama R, Abe-Doi M, et al. Preventing peripheral intravenous catheter failure by reducing mechanical irritation. *Sci Rep* 2020;10(1):1550.

- 1  
2  
3  
4 21. Indarwati F, Mathew S, Munday J, et al. Incidence of peripheral intravenous  
5 catheter failure and complications in paediatric patients: systematic review and  
6 meta analysis. *Int J Nurs Stud* 2020;102:103488.
- 7  
8  
9 22. Montgomery LA, Hanrahan K, Kottman K, et al. Guideline for i.v. infiltrations in  
10 pediatric patients. *Pediatr Nurs* 1999;25(2):167-9,173-80.
- 11  
12  
13 23. Padilla-Sánchez C, Montejano-Lozoya R, Benavent-Taengua L, et al. Risk factors  
14 associated with adverse events in neonates with peripherally inserted central  
15 catheter. *Enferm Intensiva* 2019;30(4):170-80.
- 16  
17  
18 24. Cho Y-H, Yen L-L, Yu K-L, et al. Reducing the incidence of phlebitis related to  
19 intravenous injection in pediatric patients]. *Hu Li Za Zhi* 2015;62(3 Suppl):49-57.
- 20  
21  
22 25. Mihala G, Ray-Barruel G, Chopra V, et al. Phlebitis Signs and symptoms with  
23 peripheral intravenous catheters: incidence and correlation study. *J Infus Nurs*  
24 2018;41(4):260-3.
- 25  
26  
27 26. Sharp R, Cummings M, Childs J, et al. Measurement of vein diameter for  
28 peripherally inserted central catheter (PICC) insertion: an observational study. *J*  
29 *Infus Nurs* 2015;38(5):351-7.
- 30  
31  
32 27. Arias-Fernández L, Suárez-Mier B, Martínez-Ortega MDC, et al. Incidence and risk  
33 factors of phlebitis associated to peripheral intravenous catheters. *Enferm Clin*  
34 2017;27(2):79-86.
- 35  
36  
37 28. Ray-Barruel G, Polit DF, Murfield JE, et al. Infusion phlebitis assessment  
38 measures: a systematic review. *J Eval Clin Pract* 2014;20(2):191-202.
- 39  
40  
41 29. Beall V, Hall B, Mulholland JT, et al. Neonatal extravasation: an overview and  
42 algorithm for evidence-based treatment. *Newborn Infant Nurs Rev* 2013;13(4):189-  
43 95.
- 44  
45  
46 30. Sangam SL. Quality improvement measures for early detection of severe  
47 intravenous infiltration in infants. *BMJ Open Qual* 2019;8(2):e000407.
- 48  
49  
50 31. von Elm E, Altman DG, Egger M, et al. The strengthening the reporting of  
51 observational studies in epidemiology (STROBE) statement: guidelines for  
52 reporting observational studies. *Lancet* 2007;370(9596):1453-7.
- 53  
54  
55  
56  
57  
58  
59  
60

Table 1: Procedural peripheral intravenous cannulation data

| Factor                                           | Description                     | Total cohort<br><i>N</i> = 12978 | Successful first<br>attempt<br><i>N</i> = 8481 | Unsuccessful<br>first attempt<br><i>N</i> = 4497 | <i>P</i> -value |
|--------------------------------------------------|---------------------------------|----------------------------------|------------------------------------------------|--------------------------------------------------|-----------------|
| Side of cannulation                              | <i>Left</i>                     | 7120 (55%)                       | 4794 (57%)                                     | 2326 (52%)                                       | <0.001          |
|                                                  | <i>Right</i>                    | 5854 (45%)                       | 3684 (43%)                                     | 2170 (48%)                                       |                 |
| Site of cannulation on the<br>selected extremity | <i>Hand</i>                     | 10512 (81%)                      | 7078 (83%)                                     | 3434 (76%)                                       | <0.001          |
|                                                  | <i>Wrist/ lower arm</i>         | 459 (4%)                         | 240 (3%)                                       | 219 (5%)                                         |                 |
|                                                  | <i>Elbow/ upper arm</i>         | 61 (<1%)                         | 33 (1%)                                        | 28 (1%)                                          |                 |
|                                                  | <i>Foot</i>                     | 1774 (14%)                       | 1025 (12%)                                     | 749 (17%)                                        |                 |
|                                                  | <i>Ankle/ lower leg</i>         | 119 (1%)                         | 78 (1%)                                        | 41 (1%)                                          |                 |
|                                                  | <i>Knee/ upper leg</i>          | 50 (<1%)                         | 25 (<1%)                                       | 25 (<1%)                                         |                 |
| Size of the inserted<br>catheter                 | <i>26 gauge</i>                 | 12403 (96%)                      | 8090 (96%)                                     | 4313 (96%)                                       | <0.001          |
|                                                  | <i>24 gauge</i>                 | 141 (1%)                         | 97 (1%)                                        | 44 (1%)                                          |                 |
|                                                  | <i>22 gauge</i>                 | 434 (3%)                         | 294 (3%)                                       | 140 (3%)                                         |                 |
| Indication for intravenous<br>treatment          | <i>IV fluids/ medications</i>   | 7283 (56%)                       | 4781 (56%)                                     | 2502 (56%)                                       | <0.001          |
|                                                  | <i>IV fluids/ TPN</i>           | 4330 (33%)                       | 2844 (34%)                                     | 1486 (33%)                                       |                 |
|                                                  | <i>Blood and blood products</i> | 482 (4%)                         | 285 (3%)                                       | 197 (4%)                                         |                 |
|                                                  | <i>Blood extraction</i>         | 708 (5%)                         | 455 (5%)                                       | 253 (6%)                                         |                 |

---

| <i>Procedure</i> | 175 (2%) | 116 (2%) | 59 (1%) |
|------------------|----------|----------|---------|
|------------------|----------|----------|---------|

---

*Data is represented as absolute number and percentages, which were calculated as a proportion within in the cell. IV = intravenous, TPN = total parenteral nutrition.*

For peer review only

Table 2: Data representing the reason for removal of the peripheral intravenous catheter.

| Factor                           | Description                                 | Device dwell time (hours) | Total cohort<br><i>N</i> = 12914 |
|----------------------------------|---------------------------------------------|---------------------------|----------------------------------|
| Reason for removal of the<br>VAD | <i>Therapy completed/ elective</i>          | 37±28                     | 5145 (40%)                       |
|                                  | <i>PIVIE</i>                                | 31±24                     | 5159 (40%)                       |
|                                  | <i>Phlebitis</i>                            | 29±19                     | 1590 (12%)                       |
|                                  | <i>Occlusion</i>                            | 41±29                     | 527 (4%)                         |
|                                  | <i>Dislodgement/ accidental<br/>removal</i> | 23±25                     | 286 (2%)                         |
|                                  | <i>Swelling or discoloration</i>            | 22±20                     | 65 (1%)                          |
|                                  | <i>Administrative censoring</i>             | 17±26                     | 142 (1%)                         |

*Data is represented as mean and its standard deviation or as absolute number and percentages, which were calculated as a proportion within the cell. Device dwell time is represented in hours. VAD = vascular access device, PIVIE = peripheral intravenous intravasation and extravasation. Data of 64 participants is missing.*

**Table 3: Univariate logistic regression analyses with factors affecting the risk for failure of peripheral intravenous access devices.**

| Factor                                              | $\beta$ | Odds ratio | 95% confidence interval | <i>P</i> value |
|-----------------------------------------------------|---------|------------|-------------------------|----------------|
| Sex of the participant                              | 0.108   | 1.11       | 1.04 – 1.20             | 0.003          |
| Duration of gestation in weeks                      | 0.060   | 1.06       | 1.04 – 1.09             | <0.001         |
| Current age in days since gestation                 | -0.501  | 0.61       | 0.37 – 0.99             | 0.047          |
| Weight at birth in grams                            | -0.072  | 0.93       | 0.88 – 0.97             | 0.002          |
| Current weight in grams                             | 0.037   | 1.04       | 1.01 – 1.07             | 0.010          |
| Successful first attempt of intravenous cannulation | -0.026  | 0.97       | 0.91 – 1.05             | 0.483          |
| Number of attempts to successful cannulation        | -0.026  | 0.97       | 0.93 – 1.02             | 0.255          |
| Side of cannulation                                 | 0.038   | 1.04       | 0.97 – 1.12             | 0.287          |
| Site of cannulation on the extremity                | 0.181   | 1.20       | 1.14 – 1.26             | <0.001         |
| Size of the inserted intravenous catheter           | -0.124  | 0.88       | 0.84 – 0.93             | <0.001         |
| Indication for intravenous treatment                | -0.292  | 0.75       | 0.72 – 0.78             | <0.001         |
| Time of the device in situ                          | -0.499  | 0.61       | 0.56 – 0.65             | <0.001         |
| Application of TLC observation                      | 0.327   | 1.39       | 1.31 – 1.70             | 0.002          |
| PIVIE Severity Score                                | 0.427   | 1.53       | 1.46 – 1.61             | <0.001         |
| Application of the ivWatch®                         | 0.509   | 1.66       | 1.45 – 1.91             | <0.001         |

1  
2  
3  
4  
5  
6  
7  
8  
9  
10  
11  
12  
13  
14  
15  
16  
17  
18  
19  
20  
21  
22  
23  
24  
25  
26  
27  
28  
29  
30  
31  
32  
33  
34  
35  
36  
37  
38  
39  
40  
41  
42  
43  
44  
45  
46

---

|                                     |       |      |             |       |
|-------------------------------------|-------|------|-------------|-------|
| Application of device fixation glue | 0.206 | 1.23 | 0.77 – 2.00 | 0.383 |
|-------------------------------------|-------|------|-------------|-------|

---

*TLC = touch-look-compare, PIVIE = peripheral intravenous infiltration and extravasation.*

For peer review only

**Table 4: Multivariate logistic regression analyses with factors affecting the risk for failure of peripheral intravenous access devices.**

| Factor                                    | $\beta$ | Odds ratio | 95% confidence interval | <i>P</i> value |
|-------------------------------------------|---------|------------|-------------------------|----------------|
| Weight at birth in grams                  | -1.452  | 0.23       | 0.20 – 0.28             | <0.001         |
| Current weight in grams                   | 0.062   | 1.06       | 1.03 – 1.10             | 0.001          |
| Site of cannulation on the extremity      | 0.207   | 1.23       | 1.16 – 1.30             | <0.001         |
| Size of the inserted intravenous catheter | -0.119  | 0.89       | 0.84 – 0.94             | <0.001         |
| Indication for intravenous treatment      | -0.280  | 0.76       | 0.73 – 0.79             | <0.001         |

*Constant  $\beta=0.518$  with an odds ratio of 1.68 ( $P<0.001$ ).*



Figure 1: Kaplan-Meier survival analyses for peripheral intravenous catheters.

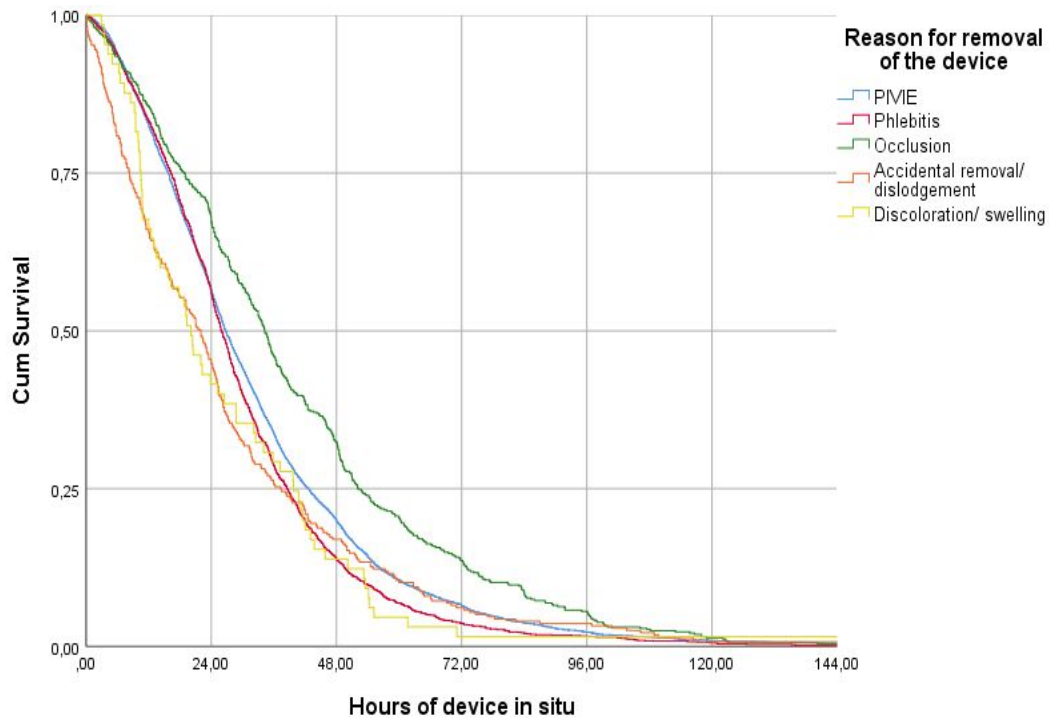

*Intravenous catheters were removed after the occurrence of a complication, of which dwell times were compared between the type of complications as measured in this study. PIVIE = peripheral intravenous infiltration and extravasation.*

**STROBE 2007 (v4) Statement—Checklist of items that should be included in reports of *cohort studies***

| Section/Topic                | Item # | Recommendation                                                                                                                                                                       | Reported on page # |
|------------------------------|--------|--------------------------------------------------------------------------------------------------------------------------------------------------------------------------------------|--------------------|
| <b>Title and abstract</b>    | 1      | (a) Indicate the study's design with a commonly used term in the title or the abstract                                                                                               | <b>1</b>           |
|                              |        | (b) Provide in the abstract an informative and balanced summary of what was done and what was found                                                                                  | <b>2</b>           |
| <b>Introduction</b>          |        |                                                                                                                                                                                      |                    |
| Background/rationale         | 2      | Explain the scientific background and rationale for the investigation being reported                                                                                                 | <b>3</b>           |
| Objectives                   | 3      | State specific objectives, including any prespecified hypotheses                                                                                                                     | <b>3</b>           |
| <b>Methods</b>               |        |                                                                                                                                                                                      |                    |
| Study design                 | 4      | Present key elements of study design early in the paper                                                                                                                              | <b>4</b>           |
| Setting                      | 5      | Describe the setting, locations, and relevant dates, including periods of recruitment, exposure, follow-up, and data collection                                                      | <b>4</b>           |
| Participants                 | 6      | (a) Give the eligibility criteria, and the sources and methods of selection of participants. Describe methods of follow-up                                                           | <b>4</b>           |
|                              |        | (b) For matched studies, give matching criteria and number of exposed and unexposed                                                                                                  | <b>4</b>           |
| Variables                    | 7      | Clearly define all outcomes, exposures, predictors, potential confounders, and effect modifiers. Give diagnostic criteria, if applicable                                             | <b>5</b>           |
| Data sources/<br>measurement | 8*     | For each variable of interest, give sources of data and details of methods of assessment (measurement). Describe comparability of assessment methods if there is more than one group | <b>5</b>           |
| Bias                         | 9      | Describe any efforts to address potential sources of bias                                                                                                                            | <b>5</b>           |
| Study size                   | 10     | Explain how the study size was arrived at                                                                                                                                            | <b>5</b>           |
| Quantitative variables       | 11     | Explain how quantitative variables were handled in the analyses. If applicable, describe which groupings were chosen and why                                                         | <b>5</b>           |
| Statistical methods          | 12     | (a) Describe all statistical methods, including those used to control for confounding                                                                                                | <b>5,6</b>         |
|                              |        | (b) Describe any methods used to examine subgroups and interactions                                                                                                                  | <b>5,6</b>         |
|                              |        | (c) Explain how missing data were addressed                                                                                                                                          | <b>5,6</b>         |
|                              |        | (d) If applicable, explain how loss to follow-up was addressed                                                                                                                       | <b>5,6</b>         |
|                              |        | (e) Describe any sensitivity analyses                                                                                                                                                | <b>5,6</b>         |
| <b>Results</b>               |        |                                                                                                                                                                                      |                    |

|                          |     |                                                                                                                                                                                                              |     |
|--------------------------|-----|--------------------------------------------------------------------------------------------------------------------------------------------------------------------------------------------------------------|-----|
| Participants             | 13* | (a) Report numbers of individuals at each stage of study—eg numbers potentially eligible, examined for eligibility, confirmed eligible, included in the study, completing follow-up, and analysed            | 7,8 |
|                          |     | (b) Give reasons for non-participation at each stage                                                                                                                                                         | 7,8 |
|                          |     | (c) Consider use of a flow diagram                                                                                                                                                                           | 7,8 |
| Descriptive data         | 14* | (a) Give characteristics of study participants (eg demographic, clinical, social) and information on exposures and potential confounders                                                                     | 7,8 |
|                          |     | (b) Indicate number of participants with missing data for each variable of interest                                                                                                                          | 7,8 |
|                          |     | (c) Summarise follow-up time (eg, average and total amount)                                                                                                                                                  | 7,8 |
| Outcome data             | 15* | Report numbers of outcome events or summary measures over time                                                                                                                                               | 7,8 |
| Main results             | 16  | (a) Give unadjusted estimates and, if applicable, confounder-adjusted estimates and their precision (eg, 95% confidence interval). Make clear which confounders were adjusted for and why they were included | 7,8 |
|                          |     | (b) Report category boundaries when continuous variables were categorized                                                                                                                                    | 7,8 |
|                          |     | (c) If relevant, consider translating estimates of relative risk into absolute risk for a meaningful time period                                                                                             | 7,8 |
| Other analyses           | 17  | Report other analyses done—eg analyses of subgroups and interactions, and sensitivity analyses                                                                                                               | 7,8 |
| <b>Discussion</b>        |     |                                                                                                                                                                                                              |     |
| Key results              | 18  | Summarise key results with reference to study objectives                                                                                                                                                     | 9   |
| <b>Limitations</b>       |     |                                                                                                                                                                                                              |     |
| Interpretation           | 20  | Give a cautious overall interpretation of results considering objectives, limitations, multiplicity of analyses, results from similar studies, and other relevant evidence                                   | 11  |
| Generalisability         | 21  | Discuss the generalisability (external validity) of the study results                                                                                                                                        | 11  |
| <b>Other information</b> |     |                                                                                                                                                                                                              |     |
| Funding                  | 22  | Give the source of funding and the role of the funders for the present study and, if applicable, for the original study on which the present article is based                                                | 13  |

\*Give information separately for cases and controls in case-control studies and, if applicable, for exposed and unexposed groups in cohort and cross-sectional studies.

**Note:** An Explanation and Elaboration article discusses each checklist item and gives methodological background and published examples of transparent reporting. The STROBE checklist is best used in conjunction with this article (freely available on the Web sites of PLoS Medicine at <http://www.plosmedicine.org/>, Annals of Internal Medicine at <http://www.annals.org/>, and Epidemiology at <http://www.epidem.com/>). Information on the STROBE Initiative is available at [www.strobe-statement.org](http://www.strobe-statement.org).

# BMJ Open

## Evaluation of unmodifiable and potentially modifiable factors affecting peripheral intravenous device related complications in neonates: a retrospective observational study.

|                                 |                                                                                                                                                                                                                                                                                                                                                                                                                                                                                                                                                                                                                                                                                                                                                                                                                                                                                                                                             |
|---------------------------------|---------------------------------------------------------------------------------------------------------------------------------------------------------------------------------------------------------------------------------------------------------------------------------------------------------------------------------------------------------------------------------------------------------------------------------------------------------------------------------------------------------------------------------------------------------------------------------------------------------------------------------------------------------------------------------------------------------------------------------------------------------------------------------------------------------------------------------------------------------------------------------------------------------------------------------------------|
| Journal:                        | <i>BMJ Open</i>                                                                                                                                                                                                                                                                                                                                                                                                                                                                                                                                                                                                                                                                                                                                                                                                                                                                                                                             |
| Manuscript ID                   | bmjopen-2020-047788.R1                                                                                                                                                                                                                                                                                                                                                                                                                                                                                                                                                                                                                                                                                                                                                                                                                                                                                                                      |
| Article Type:                   | Original research                                                                                                                                                                                                                                                                                                                                                                                                                                                                                                                                                                                                                                                                                                                                                                                                                                                                                                                           |
| Date Submitted by the Author:   | 12-May-2021                                                                                                                                                                                                                                                                                                                                                                                                                                                                                                                                                                                                                                                                                                                                                                                                                                                                                                                                 |
| Complete List of Authors:       | van Rens, Matheus F.P.T.; Hamad Medical Corporation, Neonatal Intensive Care Unit, Women's Wellness and Research Center<br>Hugill, Kevin; Hamad Medical Corporation, Neonatal Intensive Care Unit, Women's Wellness and Research Center<br>Mahmah, Mohamad A.; Hamad Medical Corporation, Neonatal Intensive Care Unit, Women's Wellness and Research Center<br>Bayoumi, Mohammad; Hamad Medical Corporation, Neonatal Intensive Care Unit, Women's Wellness and Research Center<br>Francia, Airene L.V.; Hamad Medical Corporation, Neonatal Intensive Care Unit, Women's Wellness and Research Center<br>Garcia, Krisha L.P.; Hamad Medical Corporation, Neonatal Intensive Care Unit, Women's Wellness and Research Center<br>van Loon, F.H.J.; Fontys University of Applied Sciences, Department of Science and Technology in Perioperative Nursing; Catharina Hospital, Department of Anesthesiology, Intensive Care and Pain Medicine |
| <b>Primary Subject Heading</b>: | Nursing                                                                                                                                                                                                                                                                                                                                                                                                                                                                                                                                                                                                                                                                                                                                                                                                                                                                                                                                     |
| Secondary Subject Heading:      | Emergency medicine, Intensive care, Paediatrics                                                                                                                                                                                                                                                                                                                                                                                                                                                                                                                                                                                                                                                                                                                                                                                                                                                                                             |
| Keywords:                       | NEONATOLOGY, ANAESTHETICS, Neonatal intensive & critical care < INTENSIVE & CRITICAL CARE, INTENSIVE & CRITICAL CARE                                                                                                                                                                                                                                                                                                                                                                                                                                                                                                                                                                                                                                                                                                                                                                                                                        |
|                                 |                                                                                                                                                                                                                                                                                                                                                                                                                                                                                                                                                                                                                                                                                                                                                                                                                                                                                                                                             |

SCHOLARONE™  
Manuscripts

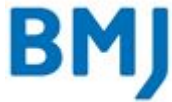

I, the Submitting Author has the right to grant and does grant on behalf of all authors of the Work (as defined in the below author licence), an exclusive licence and/or a non-exclusive licence for contributions from authors who are: i) UK Crown employees; ii) where BMJ has agreed a CC-BY licence shall apply, and/or iii) in accordance with the terms applicable for US Federal Government officers or employees acting as part of their official duties; on a worldwide, perpetual, irrevocable, royalty-free basis to BMJ Publishing Group Ltd ("BMJ") its licensees and where the relevant Journal is co-owned by BMJ to the co-owners of the Journal, to publish the Work in this journal and any other BMJ products and to exploit all rights, as set out in our [licence](#).

The Submitting Author accepts and understands that any supply made under these terms is made by BMJ to the Submitting Author unless you are acting as an employee on behalf of your employer or a postgraduate student of an affiliated institution which is paying any applicable article publishing charge ("APC") for Open Access articles. Where the Submitting Author wishes to make the Work available on an Open Access basis (and intends to pay the relevant APC), the terms of reuse of such Open Access shall be governed by a Creative Commons licence – details of these licences and which [Creative Commons](#) licence will apply to this Work are set out in our licence referred to above.

Other than as permitted in any relevant BMJ Author's Self Archiving Policies, I confirm this Work has not been accepted for publication elsewhere, is not being considered for publication elsewhere and does not duplicate material already published. I confirm all authors consent to publication of this Work and authorise the granting of this licence.

1  
2  
3 **Evaluation of unmodifiable and potentially modifiable factors affecting peripheral**  
4 **intravenous device related complications in neonates: a retrospective observational**  
5 **study.**  
6  
7  
8  
9

10  
11  
12  
13  
14  
15 Matheus F.P.T. van Rens<sup>1</sup>, Kevin Hugill<sup>1</sup>, Mohamad A. Mahmah<sup>1</sup>, Mohammad A.A.  
16  
17 Bayoumi<sup>1</sup>, Airene L.V. Francia<sup>1</sup>, Krisha L.P. Garcia<sup>1</sup>, Fredericus H.J. van Loon<sup>2,3</sup>.  
18  
19

20  
21  
22  
23 **Affiliations:** <sup>1</sup> Neonatal Intensive Care Unit, Women's Wellness and Research Center,  
24 Hamad Medical Corporation, Doha, Qatar; <sup>2</sup> Department of Science and Technology  
25  
26 in Perioperative Nursing, Fontys University of Applied Sciences, Eindhoven, The  
27  
28 Netherlands; and <sup>3</sup> Department of Anesthesiology, Intensive Care and Pain Medicine  
29  
30 Catharina Hospital, Eindhoven, The Netherlands.  
31  
32  
33  
34  
35  
36  
37  
38  
39

40 **Address correspondence to:** F.H.J. van Loon. Post to: Fontys University of Applied  
41  
42 Sciences, Department of Technical and Anesthesia Nursing Sciences, Ds. Th.  
43  
44 Fliednerstraat 2, Building TF, 5631 BN Eindhoven, The Netherlands. Email to:  
45  
46 [rick.vanloon@fontys.nl](mailto:rick.vanloon@fontys.nl).  
47  
48  
49  
50

51  
52  
53  
54 **Word count:** 2987  
55  
56  
57  
58  
59  
60

1  
2  
3  
4  
5  
6  
7  
8  
9  
10  
11  
12  
13  
14  
15  
16  
17  
18  
19  
20  
21  
22  
23  
24  
25  
26  
27  
28  
29  
30  
31  
32  
33  
34  
35  
36  
37  
38  
39  
40  
41  
42  
43  
44  
45  
46  
47  
48  
49  
50  
51  
52  
53  
54  
55  
56  
57  
58  
59  
60

For peer review only

## ABSTRACT

**Objectives:** Infants in neonatal units benefit from dependable peripheral intravenous access. However, peripheral intravenous access exposes infants to high rates of clinically minor and serious complications. Despite this, little is known about the interplay of risk factors. The aim of this study was to assess the incidence and evaluate the interactions of risk factors on the occurrence of peripheral intravenous complications in a neonatal population. **Design:** This was a retrospective observational study. **Setting:** The study was performed on the Neonatal Intensive Care Unit (NICU) of the Women's Wellness and Research Centre, Hamad Medical Corporation, Qatar as a single site study. **Participants:** This study included 12978 neonates who required intravenous therapy. **Outcome measurements:** The main outcome was the occurrence of any peripheral intravenous cannulation failure, leading to unplanned removal of the device before completion of the intended intravenous therapy. **Results:** A mean dwell time of  $36 \pm 28$  hours was recorded in participants with no complications, whereas the mean dwell time was  $31 \pm 23$  hours in participants with an indication for premature removal of the peripheral intravenous catheter ( $P < 0.001$ ,  $t = 11.35$ ). Unplanned removal occurred in 59% of cases, the overall complication rate was 18 per 1000 catheter days. Unmodifiable factors affecting peripheral intravenous catheter dwell time include lower birth (odds ratio = 0.23, 0.20 to 0.28,  $P < 0.001$ ) and current body weight (odds ratio = 1.06, 1.03 to 1.10,  $P = 0.018$ ). Cannulation site (odds ratio = 1.23, 1.16 to 1.30,  $P < 0.001$ ), the inserted device (odds ratio = 0.89, 0.84 to 0.94,  $P < 0.001$ ) and the



1  
2  
3 indication for intravenous treatment (odds ratio =0.76, 0.73 to 0.79,  $P<0.001$ ) were  
4  
5 modifiable factors. **Conclusions:** Most infants experienced a vascular access related  
6  
7 complication. Given the high complication rate, peripheral intravenous catheters  
8  
9 should be used judiciously, and thought given prior to their use as to whether alternate  
10  
11 means of intravenous access might be more appropriate.  
12  
13  
14  
15  
16  
17  
18  
19

### 20 **Strengths and limitations of this study**

- 21 • This was an observational study including a large sample of 12978 neonates.
- 22
- 23 • This study provides information on the risk of complications regarding peripheral
- 24
- 25 intravenous cannulation in neonates.
- 26
- 27
- 28
- 29
- 30 • This study is based on retrospective analyses of collected data.
- 31
- 32
- 33
- 34
- 35
- 36
- 37
- 38
- 39
- 40
- 41
- 42
- 43
- 44
- 45
- 46
- 47
- 48
- 49
- 50
- 51
- 52
- 53
- 54
- 55
- 56
- 57
- 58
- 59
- 60

## INTRODUCTION

Providing reliable vascular access in the neonatal intensive care unit (NICU) is essential to administer nutrition, fluids, medication, and blood products<sup>1</sup>. Critically ill and preterm infants benefit from early intravenous therapy<sup>2</sup>. Currently the main intravenous (IV) vascular access routes, are via peripheral and central veins. Peripheral intravenous cannulation is the most frequently performed procedure in NICU<sup>1,3</sup>. Preterm and ill infants are at an increased risk of peripheral intravenous catheter (PIVC) related complications<sup>1,3-6</sup>. In part, this is due to immature skin anatomy and physiology, immature immune system, and smaller fragile blood vessels<sup>3-6</sup>. When making decisions about vascular access requirements, a '5Rs' mnemonic (after Steere et al.<sup>7</sup>) can be referred to as an aid to supporting patient safety and wellbeing.

PIVC related complications are a major clinical concern in NICUs. Frequently encountered complications are infiltration and extravasation (PIVIE), leakage, occlusion, thrombosis, phlebitis, infection, and dislodgment or accidental removal<sup>1,4,8-12</sup>. According to Pettit<sup>13</sup>, the incidence of complications has remained constant over recent decades irrespective of clinical innovations and changes in practice. Overall, the risk for a PIVC related complication in this patient population is reported as up to 75%<sup>1,5,6,9,12,14</sup>. Of particular concern is the risk of PIVIE which according to several sources is high in the neonatal population, having an incidence of around 65%<sup>1,4,9,13</sup>. Infection rates are highly variable, but have been documented as between 2 to 49 incidents per 1000 catheter days<sup>15</sup>.

1  
2  
3  
4 Extrinsic modifiable factors influence PIVC dwell time, such as clinician training,  
5  
6 exposure, experience, choice of the optimal PIVC for the right patient for the right  
7  
8 therapy, site selection and preparation, insertion technology, maintenance care  
9  
10 bundles, stabilization materials and dressings<sup>3-5,16</sup>. Recent evidence from large scale  
11  
12 studies in neonatal populations regarding factors influencing PIVC is lacking and  
13  
14 absent for Middle Eastern settings and contexts. The current study aims to identify and  
15  
16 evaluate the relationships between unmodifiable and potentially modifiable factors with  
17  
18 the presence of PIVC related complications.  
19  
20  
21  
22  
23  
24  
25  
26  
27  
28  
29  
30  
31  
32  
33  
34  
35  
36  
37  
38  
39  
40  
41  
42  
43  
44  
45  
46  
47  
48  
49  
50  
51  
52  
53  
54  
55  
56  
57  
58  
59  
60

## METHODS

### Design and setting

This retrospective observational study uses routinely collected anonymized data from January 2019 to July 2020. The outcome of the study was the occurrence of any complication in relation to PIVC use, leading to unplanned removal of the device before completion of the intended intravenous therapy. The study was carried out on the NICU (112 cots) of the Women's Wellness and Research Centre (WWRC) of Hamad Medical Corporation (HMC), Doha, Qatar.

### Participants and sample size

Infants who were admitted to the NICU and who required intravenous therapy were included in this study. Participants were excluded from the sample if the data collection was incomplete or related to the use of other devices (centrally inserted central catheters or peripherally inserted central catheters).

### Procedure

Peripheral intravenous cannulation was performed according to hospital policy based on international guidelines<sup>17</sup>. In the study setting, peripheral intravenous cannulation is routinely performed by nurses from the NICU vascular access team (VAT). Proactive

1  
2  
3 choices to prevent patients from running out of veins and being labeled as a difficult  
4  
5  
6 vascular access patient are key in the selection of cannulation site and intravenous  
7  
8 catheter<sup>7</sup>. For that reason, saphenous and elbow veins generally are avoided for  
9  
10  
11 cannulation<sup>17</sup>. The selection of suitable veins was done using the VeinViewer®  
12  
13 (Christie Medical Holdings Inc., Lake Mary, FL, USA). Vein length, valves, and potential  
14  
15 for the vein to fill and empty itself were prior assessed using a standardized approach  
16  
17 to appraisal of the potential site. Short peripheral intravenous catheters were used if  
18  
19 therapy was predicted for up to two days, including a 26 or 24-gauge Neoflon™ Pro  
20  
21 (Becton Dickinson Infusion Therapy, Sandy, UT, USA) or a 26-gauge SuperCath™  
22  
23 Safety (ICU Medical, San Clemente, CA, USA). Extended 22-gauge peripheral  
24  
25 intravenous catheters were inserted when duration of therapy was expected to last for  
26  
27 5 days (LeaderFlex, Vygon, Lansdale, PA, USA). In situations where intravenous  
28  
29 therapy was expected to last more than 5 days central venous access is preferred.  
30  
31  
32 According to hospital protocols, and based on international guidelines, there is no  
33  
34  
35 evidence for routine rotation of vascular access devices in the neonatal population<sup>17</sup>.  
36  
37  
38  
39  
40  
41  
42  
43  
44  
45

#### 46 **Measurements and data collection**

47  
48  
49 The main outcome was the occurrence of any peripheral intravenous cannulation  
50  
51 failure, leading to unplanned removal of the device before completion of the intended  
52  
53 intravenous therapy. Patient demographics and baseline data included sex, gestational  
54  
55 age at birth in weeks and days, birth weight, and current body weight in grams. Data  
56  
57 regarding the procedure of peripheral intravenous cannulation were the date and time  
58  
59  
60

1  
2  
3  
4 of cannulation, as well as the number of attempts needed to successful cannulation,  
5  
6 cannulation side (left or right), extremity of cannulation and the site on the extremity  
7  
8 (dorsum of the hand, wrist and lower arm, elbow crease and upper arm, foot, ankle  
9  
10 and lower leg, or knee and upper leg), size of device (22, 24, or 26 gauge), the  
11  
12 indication for intravenous treatment (intravenous fluids, medications, total parenteral  
13  
14 nutrition, blood and blood products, blood extraction, or procedural), the date and time  
15  
16 of removal of the PIVC, total dwell time of the PIVC in hours (calculated as the removal  
17  
18 date and time minus the insertion date and time), and the reason for removal of the  
19  
20 PIVC (therapy completed and elective removal, PIVIE, phlebitis, occlusion,  
21  
22 dislodgement and accidental removal, discoloration, patient transferred or expired).  
23  
24 Furthermore, additional data points included the use of catheter securement glue,  
25  
26 application of ivWatch® (ivWatch LLC., Newport News, VA, USA), if the touch-look-  
27  
28 compare observation tool was used, and calculation of the PIVIE Severity Score in  
29  
30 percentages<sup>18,19</sup>. The ivWatch® was introduced into use in January 2020 and applied  
31  
32 since then with infants weighing more than 1000 grams.  
33  
34  
35  
36  
37  
38  
39  
40  
41  
42  
43  
44  
45

## 46 **Statistical analyses**

47  
48  
49 Descriptive statistics were used to summarize the outcomes with a mean and its  
50  
51 standard deviation or median and its range for continuous variables regarding its  
52  
53 normal distribution, and absolute numbers with percentage for discrete variables. The  
54  
55 assumption of normal distribution was proved with Kolmogorov-Smirnof testing.  
56  
57 Differences regarding outcomes and measurements were demonstrated by using the  
58  
59  
60

1  
2  
3  $\chi^2$ -test, Mann-Whitney  $U$  test, or unpaired samples  $t$  test, as appropriate. Stepwise  
4  
5  
6 Cox' hazard regression analyses were used to provide correlations between variables  
7  
8 regarding the outcome of this study and obtain its odds ratio with 95% confidence  
9  
10 interval. Items with a significant relationship ( $P<0.01$ ) to the outcome of this study from  
11  
12 a univariate analysis were entered in these analyses. The stepwise method was  
13  
14 utilized to remove independent variables that did not make a significant contribution to  
15  
16 the primary outcome variable using a backward elimination process based on the Wald  
17  
18 statistic and level of significance, with the removal criteria set at  $P=0.01$ , to obtain a  
19  
20 model with a minimal set of variables. Correlation between variables was measured by  
21  
22 determining Pearson's or Spearman's  $\rho$ , as appropriate. Survival analyses of PIVC in  
23  
24 terms of its dwell time were performed by plotting a Kaplan-Meier curve. Differences  
25  
26 between survival time of the PIVC according to its reason for premature removal were  
27  
28 represented with Log Rank (Mantel-Cox)  $\chi^2$ . In addition, Log Rank (Mantel-Cox)  $\chi^2$   
29  
30 analyses were used for all comparisons regarding the different outcome measures on  
31  
32 device dwell-time. A  $P<0.05$  was denoted to be statistically significant throughout this  
33  
34 study. SPSS (version 25.0; SPSS Inc., Chicago, IL, USA) was used for statistical  
35  
36 analyses.  
37  
38  
39  
40  
41  
42  
43  
44  
45  
46  
47  
48  
49  
50

### 51 **Ethics approval statement**

52  
53  
54 The study protocol (MRC-01-20-594) was approved by the local institution review body  
55  
56 (IRB). As the data source was anonymized, the local IRB deemed that participant  
57  
58 consent was not feasible nor required as they determined the study a 'chart review'.  
59  
60

1  
2  
3 Participants and their parents were not involved in the design, conduct or reporting of  
4  
5  
6 this study.  
7  
8  
9  
10

## 11 Patient and public involvement

12  
13  
14  
15 Study outcome measurements were based on recent literature and after a brainstorm  
16  
17 session with the researchers. The study did not involve any patient nor member of the  
18  
19 public in the conception, design and development of the study protocol. They were not  
20  
21 also involved in data acquisition, analyses, interpretation and development of this  
22  
23 manuscript.  
24  
25  
26  
27  
28  
29  
30  
31  
32  
33  
34  
35  
36  
37  
38  
39  
40  
41  
42  
43  
44  
45  
46  
47  
48  
49  
50  
51  
52  
53  
54  
55  
56  
57  
58  
59  
60



## RESULTS

In total, data on 15087 cannulation events in neonates was collected during the study period, of which data of 2109 participants were removed due to incompleteness, including failure to insert. The final database included 12978 participants, with 7695 (59%) being of male sex. Mean gestational age was 34+6 (23 to 43) weeks. Current age in days after birth was 9 (0 to 29) days at the time that peripheral intravenous cannulation was performed. Mean weight at birth was 2334 ±975 grams, with a mean current weight of 2410 ±931 grams at the time of cannulation.

Successful peripheral intravenous cannulation at the first attempt was obtained in 8481 participants (65%). 24% needed two attempts, 8%, 2% needed three attempts and a small number, under senior clinician oversight needed more attempts to successfully insert a PIVC. Throughout the study were 19329 insertion attempts performed to create peripheral intravenous access. Data regarding the procedure of peripheral intravenous cannulation is summarized in Table 1.

Failure of the PIVC, resulting in premature removal, occurred in 7627 participants (59%). In 5145 participants (40%), the PIVC was removed after completion of intravenous therapy. In 142 cases (1%) was the participant transferred or expired (administrative censoring). A mean dwell time of 36 ±28 hours was recorded in participants with no complications, whereas the mean dwell time was 31 ±23 hours in participants with an indication for premature removal of the PIVC ( $P<0.001$ ,

1  
2  
3  
4  $\chi^2=5850.77$ ,  $df=1$ ). Subsequently, there was a correlation between dwell times and the  
5  
6 occurrence of a PIVC related complication ( $P<0.001$ ,  $\rho=-0.099$ ). The overall PIVC  
7  
8 complication rate was 18 per 1000 catheter days. PIVIE was the most frequently  
9  
10 observed complication throughout the studied cohort, with a relative risk (RR) for  
11  
12 device failure of 3.14 (3.04 to 3.25). Additional information according to the reason for  
13  
14 removal of the PIVC is shown in Table 2.  
15  
16  
17  
18

19  
20 Total dwell time of the device in each participant until its moment of removal is  
21  
22 represented in Figure 1. 50% of PIVC were removed within the first 38 hours. Dwell  
23  
24 times differed regarding the reason for removal or the kind of PIVC related complication  
25  
26 ( $P<0.001$ ,  $\chi^2=76.83$ ,  $df=4$ ).  
27  
28  
29

30  
31 As shown in Table 3, twelve variables had a significant relation with the outcome of  
32  
33 interest in the univariate logistic analyses, resulting in premature removal of the device.  
34  
35 These items were used for multivariate analyses, resulting in a smallest set of five  
36  
37 variables correlating with the outcome of this study (Table 4).  
38  
39  
40

41  
42 A lower weight at birth (odds ratio =0.23, 0.20 to 0.28,  $P<0.001$ ) and a lower current  
43  
44 body weight (odds ratio =1.06, 1.03 to 1.10,  $P=0.018$ ) resulted in an increased risk for  
45  
46 PIVC related complications. Cannulation on the hand showed the lowest complication  
47  
48 rate (57%), whereas most complications were reported after cannulation on the ankle  
49  
50 or lower leg (72%) ( $P<0.001$ ,  $\chi^2=112.65$ ,  $df=6$ ). Inserting a 22-gauged device resulted  
51  
52 in 77% of cases in a complication, cannulation with a 26-gauged catheter led to  
53  
54 complications in 49% of insertions ( $P=0.001$ ,  $\chi^2=17.04$ ,  $df=3$ ). If TPN was the indication  
55  
56 for starting up intravenous treatment, 64% resulted in premature removal of the device,  
57  
58  
59  
60

1  
2  
3  
4 whereas only 18% of insertion resulted in a complication if cannulation was performed  
5  
6 per procedure and elective ( $P<0.001$ ,  $\chi^2=288.33$ ,  $df=4$ ). Cannulation site (odds ratio  
7  
8 =1.23, 1.16 to 1.30,  $P<0.001$ ), the inserted device (odds ratio =0.89, 0.84 to 0.94,  
9  
10  $P<0.001$ ) and the indication for intravenous treatment (odds ratio =0.76, 0.73 to 0.79,  
11  
12  $P<0.001$ ) were modifiable factors.  
13  
14  
15

16  
17 The PIVIE Severity Score was higher in participants with an indication for premature  
18  
19 removal of the device ( $13.1 \pm 8.6$ ) when compared to those without a VAD related  
20  
21 complication ( $0.8 \pm 4.1$ ) ( $P<0.001$ ,  $t=-25.409$ ). PIVIE Severity Scores were increased  
22  
23 in participants suffering from PIVIE ( $13.8 \pm 8.0$ ) and phlebitis ( $12.9 \pm 9.9$ ). Furthermore,  
24  
25 a correlation between the PIVIE Severity Score and device dwell time could be  
26  
27 obtained ( $P<0.001$ ,  $\rho=-0.122$ ). The ivWatch® was applied in 12% of participants, of  
28  
29 which 63% suffered from premature removal. The added value of this device resulted  
30  
31 in a sensitivity of 57% and a specificity of 56% ( $P<0.001$ ,  $\chi^2=54.165$ ,  $df=1$ ). Catheter  
32  
33 dwell times of  $38 \pm 26$  were seen after the application of ivWatch®, which did not differ  
34  
35 from dwell times of  $31 \pm 25$  in participants in whom the technique was not used  
36  
37 ( $P<0.001$ ,  $\chi^2=45.31$ ,  $df=1$ ). Despite, a correlation between the application of the  
38  
39 ivWatch® and device dwell times could not be obtained ( $P=0.705$ ,  $\rho=-0.006$ ). The  
40  
41 touch-look-compare observation tool was applied in 67% of cases and detected  
42  
43 complications in 61% of participants with an event ( $P=0.002$ ,  $\chi^2=9.975$ ,  $df=1$ ). The use  
44  
45 of the touch-look-compare observation tool resulted in a sensitivity of 97% and a  
46  
47 specificity of 96% and correlated with device dwell time ( $P=0.001$ ,  $\rho=-0.032$ ). The use  
48  
49 of glue for fixation of the PIVC increased the dwell time to  $34 \pm 25$  when compared to  
50  
51  
52  
53  
54  
55  
56  
57  
58  
59  
60

1  
2  
3 participants in which no glue was used (dwell time of  $28 \pm 18$ ), although the difference  
4  
5  
6 was not significant ( $P=0.623$ ,  $\chi^2=0.24$ ,  $df=1$ ). A correlation could not be seen between  
7  
8  
9 the use of glue and PIVC dwell times ( $P=0.025$ ,  $\rho=-0.106$ ).  
10  
11  
12  
13  
14  
15  
16  
17  
18  
19  
20  
21  
22  
23  
24  
25  
26  
27  
28  
29  
30  
31  
32  
33  
34  
35  
36  
37  
38  
39  
40  
41  
42  
43  
44  
45  
46  
47  
48  
49  
50  
51  
52  
53  
54  
55  
56  
57  
58  
59  
60

For peer review only

## DISCUSSION

The incidence of VAD failure is high in clinical practice, which negatively affects a neonate's comfort and outcome<sup>20,21</sup>. Failure of peripheral inserted PIVC, resulting in premature removal, occurred in 51% of participants, with a complication rate of 18 per 1000 device days. The most frequently reported complications were PIVIE and phlebitis. The risk for complications was increased in participants with a lower weight at birth and current body weight. Furthermore, the cannulation site, size and type of device, and the indication for intravenous treatment affected the risk for failure as well.

Although this study provides information on the risk of complications regarding peripheral intravenous cannulation in neonates, majority of it was reported in many articles. Nonetheless, to the best of our knowledge, a study including as many patients as the current study does was never published before on this topic.

Peripheral intravenous catheters are often the primary and most commonly inserted devices used to obtain vascular access during hospitalization<sup>20</sup>. The incidence of device failure in the current study is slightly higher when compared to the 34% pooled incidence of failure in the recently published meta-analyses by Indarwati et al.<sup>22</sup>. It is difficult to give an unambiguous clarification for this, although the pattern of complications and their relative incidence does match.

PIVIE was the most common complication in infants admitted to the NICU, with an incidence of 34% in the current study. PIVIE is defined as an unintended infusion of

1  
2  
3 fluids and/or medication in the surrounding tissue, in which infiltration is the infusion of  
4  
5 non-vesicant fluids or medication and extravasation infusion of vesicants into  
6  
7 surrounding tissues<sup>5</sup>. The determination of PIVIE can be subjective, making it hard to  
8  
9 compare the results of different studies. However, standardized training of a dedicated  
10  
11 VAT and routine review of scores can improve consensus and reduce subjectivity. The  
12  
13 incidence of infiltration reported elsewhere ranges from 6% to 87%, and the incidence  
14  
15 of extravasation between 2% and 77%<sup>22</sup>. The use of the infiltration/extravasation  
16  
17 staging instrument, as developed by Montgomery et al.<sup>23</sup>, could accomplish consensus  
18  
19 on the definition of the condition and its severity<sup>5</sup>. An explanation for the non-standard  
20  
21 use of this instrument may be that it has not been externally validated.  
22  
23  
24  
25  
26  
27  
28  
29

30 Phlebitis (inflammation of the venous wall) can cause discomfort and tissue damage.  
31  
32 The incidence was 10% in the current study which is broadly in accord with other  
33  
34 reports<sup>22-27</sup>. According to Arias-Fernandez et al.<sup>28</sup>, assessment of phlebitis is difficult  
35  
36 because the consensus for the diagnosis is low. Furthermore, a lack of consensus on  
37  
38 phlebitis measures has likely contributed to disparities in reported phlebitis incidence<sup>29</sup>.  
39  
40  
41  
42  
43

44 Several tools are used in clinical practice to reduce the risk or severity for premature  
45  
46 failure of PIVCs due to device related complications. The touch-look-compare  
47  
48 observation tool was developed at Cincinnati Children's Hospital Medical Center to  
49  
50 reduce peripheral intravenous infiltration and extravasation injuries<sup>18</sup>. This  
51  
52 documented methodical hourly assessment of patients with a PIVC can help  
53  
54 practitioners' standardize their practice and reduce variations in quality of care<sup>18</sup>. Our  
55  
56 study showed highly discriminative effects of the touch-look-compare observation tool  
57  
58  
59  
60

1  
2  
3 based on high sensitivity and specificity, which was denoted as the most decisive tool  
4  
5  
6 in detecting device related complications in earlier. Routine observations by combining  
7  
8 the touch-look-compare observation tool and the PIVIE Severity Scoring instrument  
9  
10  
11 seems to result in the most optimal situation regarding the early detection of  
12  
13  
14 complications.  
15

16  
17 It is known that the preferred cannulation site is the dorsal hand, on which fewer  
18  
19 attempts were required for successful cannulation, with fewer complications and  
20  
21 extended dwell times<sup>14</sup>. This is in accordance with the results of the current study.  
22  
23  
24 Moreover, phlebitis caused by mechanical irritation due to the device is thought to be  
25  
26 an important factor for failure<sup>21</sup>. Fixation of the device after insertion with glue increases  
27  
28 the stability of the device. Despite no significance could be obtained, dwell times were  
29  
30 increased after using glue in this study. Highest incidence of premature removal of the  
31  
32 device was seen with a 22-gauged device. Insertion of a 26-gauged catheter resulted  
33  
34 in the lowest incidence of complications. Notwithstanding, most participants in this  
35  
36 study received a 26-gauged device, possibly leading to a distorting result. To minimize  
37  
38 the risk for phlebitis, the smallest gauged catheter possible should be inserted and the  
39  
40 use of extension tubes as an accessory to the device should be avoided<sup>27</sup>.  
41  
42  
43  
44  
45  
46  
47  
48

49 Preterm infants are extra sensitive to the development of PIVIE and phlebitis due to  
50  
51 their immature immune systems<sup>22,30</sup>. Beall et al.<sup>30</sup> concluded that the inadequate anti-  
52  
53 inflammatory response may fail to release free radical scavengers leading to  
54  
55 endothelial apoptosis and injury of cell membranes and vessels. To add to this, it is  
56  
57 thought that medications or fluids with a higher osmolality increases the risk for  
58  
59  
60

1  
2  
3  
4 extravasation by irritating the endothelial lining of the vein<sup>22</sup>. Early detection of signs  
5  
6 and symptoms correlating positively with PIVC complications is crucial in limiting the  
7  
8 risk for failure of the device. Assessing pain accurately in preverbal infants is  
9  
10 challenging<sup>31</sup>. Moreover, additional occlusive fixtures and bandages to secure the  
11  
12 device add limits to identifying early stages of complications, and thus timely cessation  
13  
14 of therapy and treatment to minimize harm<sup>22,31</sup>. The incidence of complications could  
15  
16 likely be reduced with consistent and quality insertion and maintenance practices. The  
17  
18 Infusion Nurses Society provides specific recommendations for newborn infants  
19  
20 offering further specific guidelines for insertion and management practice<sup>17</sup>.  
21  
22  
23  
24  
25  
26  
27  
28  
29

### 30 **Limitations**

31  
32  
33 The current study was based on a retrospective collected dataset. In contrast to  
34  
35 randomized studies, the method creates a risk for selection bias. In the present study  
36  
37 every infant with a PIVC was included in order to minimize the risk of selection bias. In  
38  
39 addition, this current study was carried out according to the STROBE statement<sup>32</sup>.  
40  
41  
42 Inter-rater variability might have affected the results, however, our use of standardized  
43  
44 education and training and limiting vascular access to a small team (the VAT) will  
45  
46 mitigate this variability in the data. Nonetheless, future research should focus on the  
47  
48 development and validation of decisive tools and their integration with emerging  
49  
50 technologies to identify complications early.  
51  
52  
53  
54  
55  
56  
57  
58  
59  
60



## CONCLUSION AND RELEVANT IMPLICATIONS

Most infants experienced a vascular access related complication. Five variables were identified as factors affecting PIVC dwell time in patients admitted to the NICU. These factors include a lower weight at birth and current body weight, the cannulation site, size and type of device and the indication for intravenous treatment affected the risk for failure as well. The PIVC complication rate was 18 per 1000 catheter days in the current study. The risk for the development of a PIVC related complication, leading to premature removal of the device, increased with extended dwell times. It seems that when a PIVC is inserted it is not the question of if the infant will have a complication, but only a matter of when. The most frequently observed complication in the neonatal population is a PIVIE, with a RR of 3.14 (3.04 to 3.25). Consequently, we argue that PIVC should be used judiciously, and thought given prior to their use as to whether alternate means of IV access might be more appropriate.

## ADDITIONAL INFORMATION

**Conflicts of interest disclosures:** The authors declared no potential conflicts of interest with respect to the research, authorship, and/or publication of this article.

**Funding:** The authors received no financial support for the research or authorship. The local IRB made funds available to support open publication of this article.

**Data sharing statement:** De-identified individual participant data will not be made available.

**Acknowledgements:** The authors would like to thank the NICU's vascular access team and all our other colleagues in the NICU of WWRC.

**Contributor's statement:** Matheus F.P.T. van Rens was the main investigator, conceptualized and designed the study, coordinated and supervised data collection, drafted the initial manuscript, and reviewed and revised the manuscript. Kevin Hugill drafted the initial manuscript, and reviewed and revised the manuscript. Mohamad A. Mahmah critically reviewed the manuscript for important intellectual content. Mohammad A.A. Bayoumi reviewed and revised the manuscript. Airene L.V. Francia

1  
2  
3 designed the data collection instruments, collected data, and reviewed and revised the  
4  
5  
6 manuscript. Krishna L.P. Garcia designed the data collection instruments, collected  
7  
8 data, and reviewed and revised the manuscript. Fredericus H.J. van Loon  
9  
10  
11 conceptualized and designed the study, carried out the initial analyses, and critically  
12  
13  
14 reviewed the manuscript for important intellectual content and revised the manuscript.  
15  
16  
17  
18  
19  
20  
21  
22  
23  
24  
25  
26  
27  
28  
29  
30  
31  
32  
33  
34  
35  
36  
37  
38  
39  
40  
41  
42  
43  
44  
45  
46  
47  
48  
49  
50  
51  
52  
53  
54  
55  
56  
57  
58  
59  
60

For peer review only

## REFERENCES

1. Legemaat M, Carr PJ, van Rens RM, van Dijk M, Poslawsky IE, van den Hoogen A. Peripheral intravenous cannulation: complication rates in the neonatal population: a multicenter observational study. *J Vasc Access*. 2016;17(4):360-365. doi:10.5301/jva.5000558
2. Ainsworth S, McGuire W. Percutaneous central venous catheters versus peripheral cannulae for delivery of parenteral nutrition in neonates. *Cochrane database Syst Rev*. 2015;(10):CD004219. doi:10.1002/14651858.CD004219.pub4
3. Chenoweth KB, Guo J-W, Chan B. The Extended Dwell Peripheral Intravenous Catheter Is an Alternative Method of NICU Intravenous Access. *Adv neonatal care Off J Natl Assoc Neonatal Nurses*. 2018;18(4):295-301. doi:10.1097/ANC.0000000000000515
4. Odom B, Lowe L, Yates C. Peripheral Infiltration and Extravasation Injury Methodology: A Retrospective Study. *J Infus Nurs Off Publ Infus Nurses Soc*. 2018;41(4):247-252. doi:10.1097/NAN.0000000000000287

- 1  
2  
3  
4 5. Atay S, Sen S, Cukurlu D. Incidence of infiltration/extravasation in newborns  
5  
6  
7 using peripheral venous catheter and affecting factors. *Rev Esc Enferm USP*.  
8  
9  
10 2018;52:e03360. doi:10.1590/S1980-220X2017040103360  
11  
12  
13  
14 6. Unbeck M, Förberg U, Ygge B-M, Ehrenberg A, Petzold M, Johansson E.  
15  
16  
17 Peripheral venous catheter related complications are common among paediatric  
18  
19 and neonatal patients. *Acta Paediatr*. 2015;104(6):566-574.  
20  
21  
22 doi:10.1111/apa.12963  
23  
24  
25  
26  
27  
28  
29 7. Steere L, Ficara C, Davis M, Moureau N. Reaching One Peripheral Intravenous  
30  
31  
32 Catheter (PIVC) Per Patient Visit With Lean Multimodal Strategy: the PIV5Rights  
33  
34  
35 <sup>TM</sup> Bundle . *J Assoc Vasc Access*. 2019;24(3):31-43.  
36  
37  
38  
39 doi:10.2309/j.java.2019.003.004  
40  
41  
42  
43 8. Patregnani JT, Sochet AA, Klugman D. Short-Term Peripheral Vasoactive  
44  
45  
46 Infusions in Pediatrics: Where Is the Harm? *Pediatr Crit care Med a J Soc Crit*  
47  
48  
49 *Care Med World Fed Pediatr Intensive Crit Care Soc*. 2017;18(8):e378-e381.  
50  
51  
52  
53  
54 doi:10.1097/PCC.0000000000001230  
55  
56  
57  
58 9. Danski MTR, Mingorance P, Johann DA, Vayego SA, Lind J. [Incidence of local  
59  
60

- 1  
2  
3 complications and risk factors associated with peripheral intravenous catheter  
4  
5  
6  
7 in neonates]. *Rev Esc Enferm USP*. 2016;50(1):22-28. doi:10.1590/S0080-  
8  
9  
10 623420160000100003  
11  
12  
13  
14 10. Boyar V, Galiczewski C, Kurepa D. Point-of-Care Ultrasound Use in Neonatal  
15  
16  
17  
18 Peripheral Intravenous Extravasation Injuries: A Case Series. *J wound, ostomy,*  
19  
20  
21 *Cont Nurs Off Publ Wound, Ostomy Cont Nurses Soc*. 2018;45(6):503-509.  
22  
23  
24  
25 doi:10.1097/WON.0000000000000475  
26  
27  
28  
29 11. Desarno J, Sandate I, Green K, Chavez P. When in Doubt, Pull the Catheter  
30  
31  
32  
33 Out: Implementation of an Evidence-Based Protocol in the Prevention and  
34  
35  
36 Management of Peripheral Intravenous Infiltration/Extravasation in Neonates.  
37  
38  
39 *Neonatal Netw*. 2018;37(6):372-377. doi:10.1891/0730-0832.37.6.372  
40  
41  
42  
43 12. Ohki Y, Maruyama K, Harigaya A, Kohno M, Arakawa H. Complications of  
44  
45  
46  
47 peripherally inserted central venous catheter in Japanese neonatal intensive  
48  
49  
50 care units. *Pediatr Int*. 2013;55(2):185-189. doi:10.1111/ped.12033  
51  
52  
53  
54 13. Pettit J. Assessment of the infant with a peripheral intravenous device. *Adv*  
55  
56  
57  
58 *neonatal care Off J Natl Assoc Neonatal Nurses*. 2003;3(5):230-240.  
59  
60

- 1  
2  
3  
4 14. Monasor-Ortolá D, Cortés-Castell E, Martínez-Pascual C, Esteve-Ríos A, Rizo-  
5  
6  
7 Baeza MM. Factors Influencing the Success of Peripheral Venous Access in  
8  
9  
10 Neonates. *J Pediatr Nurs*. 2019;47:e30-e35. doi:10.1016/j.pedn.2019.04.017  
11  
12  
13  
14 15. Wu J, Mu D. Vascular catheter-related complications in newborns. *J Paediatr*  
15  
16  
17 *Child Health*. 2012;48(2):E91-5. doi:10.1111/j.1440-1754.2010.01934.x  
18  
19  
20  
21  
22 16. Rickard CM, Marsh NM, Webster J, et al. Intravascular device administration  
23  
24  
25 sets: replacement after standard versus prolonged use in hospitalised patients-a  
26  
27  
28 study protocol for a randomised controlled trial (The RSVP Trial). *BMJ Open*.  
29  
30  
31 2015;5(2):e007257. doi:10.1136/bmjopen-2014-007257  
32  
33  
34  
35  
36 17. Gorski LA, Hadaway L, Hagle ME, et al. Infusion Therapy Standards of Practice,  
37  
38  
39 8th Edition. *J Infus Nurs Off Publ Infus Nurses Soc*. 2021;44(1S Suppl 1):S1-  
40  
41  
42 S224. doi:10.1097/NAN.0000000000000396  
43  
44  
45  
46  
47 18. Tofani BF, Rineair SA, Gosdin CH, et al. Quality improvement project to reduce  
48  
49  
50 infiltration and extravasation events in a pediatric hospital. *J Pediatr Nurs*.  
51  
52  
53 2012;27(6):682-689. doi:10.1016/j.pedn.2012.01.005  
54  
55  
56  
57  
58 19. Doellman D, Hadaway L, Bowe-Geddes LA, et al. Infiltration and extravasation:  
59  
60

- 1  
2  
3 update on prevention and management. *J Infus Nurs Off Publ Infus Nurses Soc.*  
4  
5  
6  
7 2009;32(4):203-211. doi:10.1097/NAN.0b013e3181aac042  
8  
9  
10  
11 20. Alexandrou E, Ray-Barruel G, Carr PJ, et al. Use of Short Peripheral Intravenous  
12  
13 Catheters: Characteristics, Management, and Outcomes Worldwide. *J Hosp*  
14  
15  
16  
17  
18 *Med.* 2018;13(5). doi:10.12788/jhm.3039  
19  
20  
21  
22 21. Takahashi T, Murayama R, Abe-Doi M, et al. Preventing peripheral intravenous  
23  
24 catheter failure by reducing mechanical irritation. *Sci Rep.* 2020;10(1):1550.  
25  
26  
27  
28  
29 doi:10.1038/s41598-019-56873-2  
30  
31  
32  
33 22. Indarwati F, Mathew S, Munday J, Keogh S. Incidence of peripheral intravenous  
34  
35 catheter failure and complications in paediatric patients: Systematic review and  
36  
37  
38  
39 meta analysis. *Int J Nurs Stud.* 2020;102:103488.  
40  
41  
42  
43  
44 doi:10.1016/j.ijnurstu.2019.103488  
45  
46  
47  
48 23. Montgomery LA, Hanrahan K, Kottman K, Otto A, Barrett T, Hermiston B.  
49  
50  
51  
52  
53  
54  
55  
56  
57  
58  
59  
60  
60  
27



- 1  
2  
3 factors associated with adverse events in neonates with peripherally inserted  
4  
5  
6  
7 central catheter. *Enferm intensiva*. 2019;30(4):170-180.  
8  
9  
10  
11 doi:10.1016/j.enfi.2018.10.006  
12  
13  
14  
15 25. Cho Y-H, Yen L-L, Yu K-L, Chang C-C, Chen H-L. [Reducing the Incidence of  
16  
17  
18 Phlebitis Related to Intravenous Injection in Pediatric Patients]. *Hu Li Za Zhi*.  
19  
20  
21 2015;62(3 Suppl):49-57. doi:10.6224/JN.62.3S.49  
22  
23  
24  
25 26. Mihala G, Ray-Barruel G, Chopra V, et al. Phlebitis Signs and Symptoms With  
26  
27  
28  
29  
30  
31  
32  
33  
34  
35  
36  
37  
38  
39  
40  
41  
42  
43  
44  
45  
46  
47  
48  
49  
50  
51  
52  
53  
54  
55  
56  
57  
58  
59  
60
- Peripheral Intravenous Catheters: Incidence and Correlation Study. *J Infus Nurs*  
*Off Publ Infus Nurses Soc*. 2018;41(4):260-263.  
doi:10.1097/NAN.000000000000288
27. Sharp R, Cummings M, Childs J, et al. Measurement of Vein Diameter for  
Peripherally Inserted Central Catheter (PICC) Insertion: An Observational Study.  
*J Infus Nurs*. 2015;38(5):351-357. doi:10.1097/NAN.000000000000125
28. Arias-Fernández L, Suárez-Mier B, Martínez-Ortega MDC, Lana A. Incidence  
and risk factors of phlebitis associated to peripheral intravenous catheters.  
*Enferm Clin*. 2017;27(2):79-86. doi:10.1016/j.enfcli.2016.07.008

- 1  
2  
3  
4  
5  
6  
7  
8  
9  
10  
11  
12  
13  
14  
15  
16  
17  
18  
19  
20  
21  
22  
23  
24  
25  
26  
27  
28  
29  
30  
31  
32  
33  
34  
35  
36  
37  
38  
39  
40  
41  
42  
43  
44  
45  
46  
47  
48  
49  
50  
51  
52  
53  
54  
55  
56  
57  
58  
59  
60
29. Ray-Barruel G, Polit DF, Murfield JE, Rickard CM. Infusion phlebitis assessment measures: a systematic review. *J Eval Clin Pract.* 2014;20(2):191-202. doi:10.1111/jep.12107
30. Beall V, Hall B, Mulholland JT, Gephart SM. Neonatal Extravasation: An Overview and Algorithm for Evidence-based Treatment. *Newborn Infant Nurs Rev.* 2013;13(4):189-195. doi:https://doi.org/10.1053/j.nainr.2013.09.001
31. Sangam SL. Quality improvement measures for early detection of severe intravenous infiltration in infants. *BMJ open Qual.* 2019;8(2):e000407. doi:10.1136/bmjopen-2018-000407
32. von Elm E, Altman DG, Egger M, Pocock SJ, Gotsche PC, Vandenbroucke JP. The Strengthening the Reporting of Observational Studies in Epidemiology (STROBE) statement: guidelines for reporting observational studies. *Lancet (London, England).* 2007;370(9596):1453-1457. doi:10.1016/S0140-6736(07)61602-X

Table 1: Procedural peripheral intravenous cannulation data

| Factor                                           | Description                     | Total cohort<br><i>N</i> = 12978 | Successful first<br>attempt<br><i>N</i> = 8481 | Unsuccessful<br>first attempt<br><i>N</i> = 4497 | <i>P</i> -value |
|--------------------------------------------------|---------------------------------|----------------------------------|------------------------------------------------|--------------------------------------------------|-----------------|
| Side of cannulation                              | <i>Left</i>                     | 7120 (55%)                       | 4794 (57%)                                     | 2326 (52%)                                       | <0.001          |
|                                                  | <i>Right</i>                    | 5854 (45%)                       | 3684 (43%)                                     | 2170 (48%)                                       |                 |
| Site of cannulation on the<br>selected extremity | <i>Hand</i>                     | 10512 (81%)                      | 7078 (83%)                                     | 3434 (76%)                                       | <0.001          |
|                                                  | <i>Wrist/ lower arm</i>         | 459 (4%)                         | 240 (3%)                                       | 219 (5%)                                         |                 |
|                                                  | <i>Elbow/ upper arm</i>         | 61 (<1%)                         | 33 (1%)                                        | 28 (1%)                                          |                 |
|                                                  | <i>Foot</i>                     | 1774 (14%)                       | 1025 (12%)                                     | 749 (17%)                                        |                 |
|                                                  | <i>Ankle/ lower leg</i>         | 119 (1%)                         | 78 (1%)                                        | 41 (1%)                                          |                 |
|                                                  | <i>Knee/ upper leg</i>          | 50 (<1%)                         | 25 (<1%)                                       | 25 (<1%)                                         |                 |
| Size of the inserted<br>catheter                 | <i>26 gauge</i>                 | 12403 (96%)                      | 8090 (96%)                                     | 4313 (96%)                                       | <0.001          |
|                                                  | <i>24 gauge</i>                 | 141 (1%)                         | 97 (1%)                                        | 44 (1%)                                          |                 |
|                                                  | <i>22 gauge</i>                 | 434 (3%)                         | 294 (3%)                                       | 140 (3%)                                         |                 |
| Indication for intravenous<br>treatment          | <i>IV fluids/ medications</i>   | 7283 (56%)                       | 4781 (56%)                                     | 2502 (56%)                                       | <0.001          |
|                                                  | <i>IV fluids/ TPN</i>           | 4330 (33%)                       | 2844 (34%)                                     | 1486 (33%)                                       |                 |
|                                                  | <i>Blood and blood products</i> | 482 (4%)                         | 285 (3%)                                       | 197 (4%)                                         |                 |
|                                                  | <i>Blood extraction</i>         | 708 (5%)                         | 455 (5%)                                       | 253 (6%)                                         |                 |

---

| <i>Procedure</i> | 175 (2%) | 116 (2%) | 59 (1%) |
|------------------|----------|----------|---------|
|------------------|----------|----------|---------|

---

*Data is represented as absolute number and percentages, which were calculated as a proportion within in the cell. IV = intravenous, TPN = total parenteral nutrition.*

For peer review only

Table 2: Data representing the reason for removal of the peripheral intravenous catheter.

| Factor                        | Description                             | Device dwell time (hours) | Total cohort <i>N</i> = 12914 |
|-------------------------------|-----------------------------------------|---------------------------|-------------------------------|
| Reason for removal of the VAD | <i>Therapy completed/ elective</i>      | 36 ±28                    | 5145 (40%)                    |
|                               | <i>PIVIE</i>                            | 31 ±24                    | 5159 (40%)                    |
|                               | <i>Phlebitis</i>                        | 29 ±19                    | 1590 (12%)                    |
|                               | <i>Occlusion</i>                        | 41 ±29                    | 527 (4%)                      |
|                               | <i>Dislodgement/ accidental removal</i> | 23 ±25                    | 286 (2%)                      |
|                               | <i>Swelling or discoloration</i>        | 22 ±20                    | 65 (1%)                       |
|                               | <i>Administrative censoring</i>         | 17 ±26                    | 142 (1%)                      |

*Data is represented as mean and its standard deviation or as absolute number and percentages, which were calculated as a proportion within the cell. Device dwell time is represented in hours. VAD = vascular access device, PIVIE = peripheral intravenous intravasation and extravasation. Data of 64 participants is missing.*

**Table 3: Univariate Cox' hazard regression analyses with factors affecting the risk for failure of peripheral intravenous access devices.**

| Factor                                       | $\beta$ | Odds ratio | 95% confidence interval | <i>P</i> value |
|----------------------------------------------|---------|------------|-------------------------|----------------|
| Sex of the participant                       | 0.025   | 1.03       | 0.98 – 1.07             | 0.292          |
| Duration of gestation in weeks               | -0.014  | 0.98       | 0.98 – 0.99             | <0.001         |
| Current age in days since gestation          | -0.501  | 0.61       | 0.37 – 0.99             | 0.047          |
| Weight at birth in grams                     | -0.072  | 0.93       | 0.88 – 0.97             | 0.002          |
| Current weight in grams                      | 0.037   | 1.04       | 1.01 – 1.07             | 0.010          |
| Successful first attempt of cannulation      | 0.006   | 1.01       | 0.95 – 1.06             | 0.810          |
| Number of attempts to successful cannulation | -0.005  | 0.99       | 0.96 – 1.03             | 0.758          |
| Side of cannulation                          | 0.161   | 1.18       | 1.12 – 1.23             | <0.001         |
| Site of cannulation on the extremity         | 0.079   | 1.08       | 1.05 – 1.11             | <0.001         |
| Size of the inserted intravenous catheter    | -0.080  | 0.92       | 0.89 – 0.96             | <0.001         |
| Indication for intravenous treatment         | -0.292  | 0.75       | 0.72 – 0.78             | <0.001         |
| Time of the device in situ                   | -0.499  | 0.61       | 0.56 – 0.65             | <0.001         |
| Application of TLC observation               | 0.265   | 1.30       | 1.13 – 1.50             | <0.001         |
| PIVIE Severity Score                         | 0.023   | 1.02       | 1.01 – 1.03             | <0.001         |
| Application of the ivWatch®                  | 0.199   | 1.22       | 1.12 – 1.33             | <0.001         |

1  
2  
3  
4  
5  
6  
7  
8  
9  
10  
11  
12  
13  
14  
15  
16  
17  
18  
19  
20  
21  
22  
23  
24  
25  
26  
27  
28  
29  
30  
31  
32  
33  
34  
35  
36  
37  
38  
39  
40  
41  
42  
43  
44  
45  
46

---

|                                     |        |      |             |       |
|-------------------------------------|--------|------|-------------|-------|
| Application of device fixation glue | -0.118 | 0.89 | 0.64 – 1.23 | 0.477 |
|-------------------------------------|--------|------|-------------|-------|

---

*TLC = touch-look-compare, PIVIE = peripheral intravenous infiltration and extravasation.*

For peer review only

Table 4: Multivariate Cox' hazard regression analyses with factors affecting the risk for failure of peripheral intravenous access devices.

| Factor                                    | $\beta$ | Odds ratio | 95% confidence interval | <i>P</i> value |
|-------------------------------------------|---------|------------|-------------------------|----------------|
| Weight at birth in grams                  | -1.452  | 0.23       | 0.20 – 0.28             | <0.001         |
| Current weight in grams                   | 0.062   | 1.06       | 1.03 – 1.10             | 0.018          |
| Site of cannulation on the extremity      | 0.207   | 1.23       | 1.16 – 1.30             | <0.001         |
| Size of the inserted intravenous catheter | -0.119  | 0.89       | 0.84 – 0.94             | <0.001         |
| Indication for intravenous treatment      | -0.280  | 0.76       | 0.73 – 0.79             | <0.001         |



1  
2  
3  
4 **Figure 1: Kaplan-Meier survival analyses for peripheral intravenous catheters.**  
5

6 *Intravenous catheters were removed after the occurrence of a complication, of which*  
7 *dwelling times were compared between the type of complications as measured in this*  
8 *study. PIVIE = peripheral intravenous infiltration and extravasation.*  
9

10  
11 \* Figure was attached as separated file.  
12  
13  
14  
15  
16  
17  
18  
19  
20  
21  
22  
23  
24  
25  
26  
27  
28  
29  
30  
31  
32  
33  
34  
35  
36  
37  
38  
39  
40  
41  
42  
43  
44  
45  
46  
47  
48  
49  
50  
51  
52  
53  
54  
55  
56  
57  
58  
59  
60

For peer review only

Figure 1: Kaplan-Meier survival analyses for peripheral intravenous catheters.

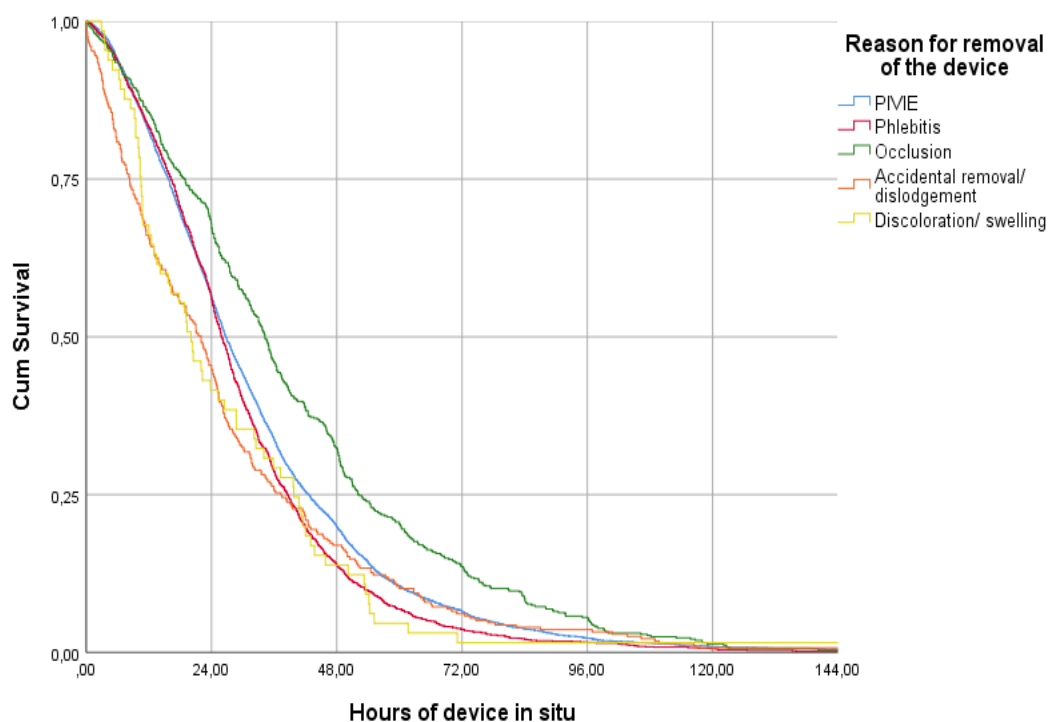

*Intravenous catheters were removed after the occurrence of a complication, of which dwell times were compared between the type of complications as measured in this study. PIVIE = peripheral intravenous infiltration and extravasation.*

**STROBE 2007 (v4) Statement—Checklist of items that should be included in reports of cohort studies**

| Section/Topic             | Item # | Recommendation                                                                                                                                                                       | Reported on page # |
|---------------------------|--------|--------------------------------------------------------------------------------------------------------------------------------------------------------------------------------------|--------------------|
| <b>Title and abstract</b> | 1      | (a) Indicate the study’s design with a commonly used term in the title or the abstract                                                                                               | <b>1</b>           |
|                           |        | (b) Provide in the abstract an informative and balanced summary of what was done and what was found                                                                                  | <b>2</b>           |
| <b>Introduction</b>       |        |                                                                                                                                                                                      |                    |
| Background/rationale      | 2      | Explain the scientific background and rationale for the investigation being reported                                                                                                 | <b>3</b>           |
| Objectives                | 3      | State specific objectives, including any prespecified hypotheses                                                                                                                     | <b>3</b>           |
| <b>Methods</b>            |        |                                                                                                                                                                                      |                    |
| Study design              | 4      | Present key elements of study design early in the paper                                                                                                                              | <b>4</b>           |
| Setting                   | 5      | Describe the setting, locations, and relevant dates, including periods of recruitment, exposure, follow-up, and data collection                                                      | <b>4</b>           |
| Participants              | 6      | (a) Give the eligibility criteria, and the sources and methods of selection of participants. Describe methods of follow-up                                                           | <b>4</b>           |
|                           |        | (b) For matched studies, give matching criteria and number of exposed and unexposed                                                                                                  | <b>4</b>           |
| Variables                 | 7      | Clearly define all outcomes, exposures, predictors, potential confounders, and effect modifiers. Give diagnostic criteria, if applicable                                             | <b>5</b>           |
| Data sources/ measurement | 8*     | For each variable of interest, give sources of data and details of methods of assessment (measurement). Describe comparability of assessment methods if there is more than one group | <b>5</b>           |
| Bias                      | 9      | Describe any efforts to address potential sources of bias                                                                                                                            | <b>5</b>           |
| Study size                | 10     | Explain how the study size was arrived at                                                                                                                                            | <b>5</b>           |
| Quantitative variables    | 11     | Explain how quantitative variables were handled in the analyses. If applicable, describe which groupings were chosen and why                                                         | <b>5</b>           |
| Statistical methods       | 12     | (a) Describe all statistical methods, including those used to control for confounding                                                                                                | <b>5,6</b>         |
|                           |        | (b) Describe any methods used to examine subgroups and interactions                                                                                                                  | <b>5,6</b>         |
|                           |        | (c) Explain how missing data were addressed                                                                                                                                          | <b>5,6</b>         |
|                           |        | (d) If applicable, explain how loss to follow-up was addressed                                                                                                                       | <b>5,6</b>         |
|                           |        | (e) Describe any sensitivity analyses                                                                                                                                                | <b>5,6</b>         |
| <b>Results</b>            |        |                                                                                                                                                                                      |                    |

|                          |     |                                                                                                                                                                                                              |     |
|--------------------------|-----|--------------------------------------------------------------------------------------------------------------------------------------------------------------------------------------------------------------|-----|
| Participants             | 13* | (a) Report numbers of individuals at each stage of study—eg numbers potentially eligible, examined for eligibility, confirmed eligible, included in the study, completing follow-up, and analysed            | 7,8 |
|                          |     | (b) Give reasons for non-participation at each stage                                                                                                                                                         | 7,8 |
|                          |     | (c) Consider use of a flow diagram                                                                                                                                                                           | 7,8 |
| Descriptive data         | 14* | (a) Give characteristics of study participants (eg demographic, clinical, social) and information on exposures and potential confounders                                                                     | 7,8 |
|                          |     | (b) Indicate number of participants with missing data for each variable of interest                                                                                                                          | 7,8 |
|                          |     | (c) Summarise follow-up time (eg, average and total amount)                                                                                                                                                  | 7,8 |
| Outcome data             | 15* | Report numbers of outcome events or summary measures over time                                                                                                                                               | 7,8 |
| Main results             | 16  | (a) Give unadjusted estimates and, if applicable, confounder-adjusted estimates and their precision (eg, 95% confidence interval). Make clear which confounders were adjusted for and why they were included | 7,8 |
|                          |     | (b) Report category boundaries when continuous variables were categorized                                                                                                                                    | 7,8 |
|                          |     | (c) If relevant, consider translating estimates of relative risk into absolute risk for a meaningful time period                                                                                             | 7,8 |
| Other analyses           | 17  | Report other analyses done—eg analyses of subgroups and interactions, and sensitivity analyses                                                                                                               | 7,8 |
| <b>Discussion</b>        |     |                                                                                                                                                                                                              |     |
| Key results              | 18  | Summarise key results with reference to study objectives                                                                                                                                                     | 9   |
| <b>Limitations</b>       |     |                                                                                                                                                                                                              |     |
| Interpretation           | 20  | Give a cautious overall interpretation of results considering objectives, limitations, multiplicity of analyses, results from similar studies, and other relevant evidence                                   | 11  |
| Generalisability         | 21  | Discuss the generalisability (external validity) of the study results                                                                                                                                        | 11  |
| <b>Other information</b> |     |                                                                                                                                                                                                              |     |
| Funding                  | 22  | Give the source of funding and the role of the funders for the present study and, if applicable, for the original study on which the present article is based                                                | 13  |

\*Give information separately for cases and controls in case-control studies and, if applicable, for exposed and unexposed groups in cohort and cross-sectional studies.

**Note:** An Explanation and Elaboration article discusses each checklist item and gives methodological background and published examples of transparent reporting. The STROBE checklist is best used in conjunction with this article (freely available on the Web sites of PLoS Medicine at <http://www.plosmedicine.org/>, Annals of Internal Medicine at <http://www.annals.org/>, and Epidemiology at <http://www.epidem.com/>). Information on the STROBE Initiative is available at [www.strobe-statement.org](http://www.strobe-statement.org).

# BMJ Open

## Evaluation of unmodifiable and potentially modifiable factors affecting peripheral intravenous device related complications in neonates: a retrospective observational study.

|                                 |                                                                                                                                                                                                                                                                                                                                                                                                                                                                                                                                                                                                                                                                                                                                                                                           |
|---------------------------------|-------------------------------------------------------------------------------------------------------------------------------------------------------------------------------------------------------------------------------------------------------------------------------------------------------------------------------------------------------------------------------------------------------------------------------------------------------------------------------------------------------------------------------------------------------------------------------------------------------------------------------------------------------------------------------------------------------------------------------------------------------------------------------------------|
| Journal:                        | <i>BMJ Open</i>                                                                                                                                                                                                                                                                                                                                                                                                                                                                                                                                                                                                                                                                                                                                                                           |
| Manuscript ID                   | bmjopen-2020-047788.R2                                                                                                                                                                                                                                                                                                                                                                                                                                                                                                                                                                                                                                                                                                                                                                    |
| Article Type:                   | Original research                                                                                                                                                                                                                                                                                                                                                                                                                                                                                                                                                                                                                                                                                                                                                                         |
| Date Submitted by the Author:   | 21-Aug-2021                                                                                                                                                                                                                                                                                                                                                                                                                                                                                                                                                                                                                                                                                                                                                                               |
| Complete List of Authors:       | van Rens, Matheus F.P.T.; Hamad Medical Corporation, Neonatal Intensive Care Unit, Women's Wellness and Research Center<br>Hugill, Kevin; Hamad Medical Corporation, Neonatal Intensive Care Unit, Women's Wellness and Research Center<br>Mahmah, Mohamad A.; Hamad Medical Corporation, Neonatal Intensive Care Unit, Women's Wellness and Research Center<br>Bayoumi, Mohammad; Hamad Medical Corporation, Neonatal Intensive Care Unit, Women's Wellness and Research Center<br>Francia, Airene L.V.; Hamad Medical Corporation, Neonatal Intensive Care Unit, Women's Wellness and Research Center<br>Garcia, Krisha L.P.; Hamad Medical Corporation, Neonatal Intensive Care Unit, Women's Wellness and Research Center<br>van Loon, F.H.J.; Fontys University of Applied Sciences, |
| <b>Primary Subject Heading</b>: | Nursing                                                                                                                                                                                                                                                                                                                                                                                                                                                                                                                                                                                                                                                                                                                                                                                   |
| Secondary Subject Heading:      | Emergency medicine, Intensive care, Paediatrics                                                                                                                                                                                                                                                                                                                                                                                                                                                                                                                                                                                                                                                                                                                                           |
| Keywords:                       | NEONATOLOGY, ANAESTHETICS, Neonatal intensive & critical care < INTENSIVE & CRITICAL CARE, INTENSIVE & CRITICAL CARE                                                                                                                                                                                                                                                                                                                                                                                                                                                                                                                                                                                                                                                                      |
|                                 |                                                                                                                                                                                                                                                                                                                                                                                                                                                                                                                                                                                                                                                                                                                                                                                           |

SCHOLARONE™  
Manuscripts



I, the Submitting Author has the right to grant and does grant on behalf of all authors of the Work (as defined in the below author licence), an exclusive licence and/or a non-exclusive licence for contributions from authors who are: i) UK Crown employees; ii) where BMJ has agreed a CC-BY licence shall apply, and/or iii) in accordance with the terms applicable for US Federal Government officers or employees acting as part of their official duties; on a worldwide, perpetual, irrevocable, royalty-free basis to BMJ Publishing Group Ltd ("BMJ") its licensees and where the relevant Journal is co-owned by BMJ to the co-owners of the Journal, to publish the Work in this journal and any other BMJ products and to exploit all rights, as set out in our [licence](#).

The Submitting Author accepts and understands that any supply made under these terms is made by BMJ to the Submitting Author unless you are acting as an employee on behalf of your employer or a postgraduate student of an affiliated institution which is paying any applicable article publishing charge ("APC") for Open Access articles. Where the Submitting Author wishes to make the Work available on an Open Access basis (and intends to pay the relevant APC), the terms of reuse of such Open Access shall be governed by a Creative Commons licence – details of these licences and which [Creative Commons](#) licence will apply to this Work are set out in our licence referred to above.

Other than as permitted in any relevant BMJ Author's Self Archiving Policies, I confirm this Work has not been accepted for publication elsewhere, is not being considered for publication elsewhere and does not duplicate material already published. I confirm all authors consent to publication of this Work and authorise the granting of this licence.

1  
2  
3 **Evaluation of unmodifiable and potentially modifiable factors affecting peripheral**  
4 **intravenous device related complications in neonates: a retrospective observational**  
5 **study.**  
6  
7  
8  
9

10  
11  
12  
13  
14  
15 Matheus F.P.T. van Rens<sup>1</sup>, Kevin Hugill<sup>1</sup>, Mohamad A. Mahmah<sup>1</sup>, Mohammad A.A.  
16  
17 Bayoumi<sup>1</sup>, Airene L.V. Francia<sup>1</sup>, Krisha L.P. Garcia<sup>1</sup>, Fredericus H.J. van Loon<sup>2,3</sup>.  
18  
19

20  
21  
22  
23 **Affiliations:** <sup>1</sup> Neonatal Intensive Care Unit, Women's Wellness and Research Center,  
24 Hamad Medical Corporation, Doha, Qatar; <sup>2</sup> Department of Science and Technology  
25  
26 in Perioperative Nursing, Fontys University of Applied Sciences, Eindhoven, The  
27  
28 Netherlands; and <sup>3</sup> Department of Anesthesiology, Intensive Care and Pain Medicine  
29  
30 Catharina Hospital, Eindhoven, The Netherlands.  
31  
32  
33  
34  
35  
36  
37  
38  
39

40 **Address correspondence to:** F.H.J. van Loon. Post to: Fontys University of Applied  
41  
42 Sciences, Department of Technical and Anesthesia Nursing Sciences, Ds. Th.  
43  
44 Fliednerstraat 2, Building TF, 5631 BN Eindhoven, The Netherlands. Email to:  
45  
46 [rick.vanloon@fontys.nl](mailto:rick.vanloon@fontys.nl).  
47  
48  
49  
50

51  
52  
53  
54 **Word count:** 2987  
55  
56  
57  
58  
59  
60

1  
2  
3  
4  
5  
6  
7  
8  
9  
10  
11  
12  
13  
14  
15  
16  
17  
18  
19  
20  
21  
22  
23  
24  
25  
26  
27  
28  
29  
30  
31  
32  
33  
34  
35  
36  
37  
38  
39  
40  
41  
42  
43  
44  
45  
46  
47  
48  
49  
50  
51  
52  
53  
54  
55  
56  
57  
58  
59  
60

For peer review only



## ABSTRACT

**Objectives:** Infants in neonatal units benefit from dependable peripheral intravenous access. However, peripheral intravenous access exposes infants to high rates of clinically minor and serious complications. Despite this, little is known about the interplay of risk factors. The aim of this study was to assess the incidence and evaluate the interactions of risk factors on the occurrence of peripheral intravenous complications in a neonatal population. **Design:** This was a retrospective observational study. **Setting:** The study was performed on the Neonatal Intensive Care Unit (NICU) of the Women's Wellness and Research Centre, Hamad Medical Corporation, Qatar as a single site study. **Participants:** This study included 12978 neonates who required intravenous therapy. **Outcome measurements:** The main outcome was the occurrence of any peripheral intravenous cannulation failure, leading to unplanned removal of the device before completion of the intended intravenous therapy. **Results:** A mean dwell time of  $36 \pm 28$  hours was recorded in participants with no complications, whereas the mean dwell time was  $31 \pm 23$  hours in participants with an indication for premature removal of the peripheral intravenous catheter ( $P < 0.001$ ,  $t = 11.35$ ). Unplanned removal occurred in 59% of cases, the overall complication rate was 18 per 1000 catheter days. Unmodifiable factors affecting peripheral intravenous catheter dwell time include lower birth (hazard ratio = 0.23, 0.20 to 0.28,  $P < 0.001$ ) and current body weight (hazard ratio = 1.06, 1.03 to 1.10,  $P = 0.018$ ). Cannulation site (hazard ratio = 1.23, 1.16 to 1.30,  $P < 0.001$ ), the inserted device (hazard ratio = 0.89, 0.84 to 0.94,  $P < 0.001$ ) and the

1  
2  
3 indication for intravenous treatment (hazard ratio =0.76, 0.73 to 0.79,  $P<0.001$ ) were  
4  
5 modifiable factors. **Conclusions:** Most infants experienced a vascular access related  
6  
7 complication. Given the high complication rate, peripheral intravenous catheters  
8  
9 should be used judiciously, and thought given prior to their use as to whether alternate  
10  
11 means of intravenous access might be more appropriate.  
12  
13  
14  
15  
16  
17  
18  
19

### 20 **Strengths and limitations of this study**

- 21 • This was an observational study including a large sample of 12978 neonates.
  - 22 • This study provides information on the risk of complications regarding peripheral  
23 intravenous cannulation in neonates.
  - 24 • This study is based on retrospective analyses of collected data.
- 25  
26  
27  
28  
29  
30  
31  
32  
33  
34  
35  
36  
37  
38  
39  
40  
41  
42  
43  
44  
45  
46  
47  
48  
49  
50  
51  
52  
53  
54  
55  
56  
57  
58  
59  
60

## INTRODUCTION

Providing reliable vascular access in the neonatal intensive care unit (NICU) is essential to administer nutrition, fluids, medication, and blood products<sup>1</sup>. Critically ill and preterm infants benefit from early intravenous therapy<sup>2</sup>. Currently the main intravenous (IV) vascular access routes, are via peripheral and central veins. Peripheral intravenous cannulation is the most frequently performed procedure in NICU<sup>1,3</sup>. Preterm and ill infants are at an increased risk of peripheral intravenous catheter (PIVC) related complications<sup>1,3-6</sup>. In part, this is due to immature skin anatomy and physiology, immature immune system, and smaller fragile blood vessels<sup>3-6</sup>. When making decisions about vascular access requirements, a '5Rs' mnemonic (after Steere et al.<sup>7</sup>) can be referred to as an aid to supporting patient safety and wellbeing.

PIVC related complications are a major clinical concern in NICUs. Frequently encountered complications are infiltration and extravasation (PIVIE), leakage, occlusion, thrombosis, phlebitis, infection, and dislodgment or accidental removal<sup>1,4,8-12</sup>. According to Pettit<sup>13</sup>, the incidence of complications has remained constant over recent decades irrespective of clinical innovations and changes in practice. Overall, the risk for a PIVC related complication in this patient population is reported as up to 75%<sup>1,5,6,9,12,14</sup>. Of particular concern is the risk of PIVIE which according to several sources is high in the neonatal population, having an incidence of around 65%<sup>1,4,9,13</sup>. Infection rates are highly variable, but have been documented as between 2 to 49 incidents per 1000 catheter days<sup>15</sup>.

1  
2  
3  
4 Extrinsic modifiable factors influence PIVC dwell time, such as clinician training,  
5  
6 exposure, experience, choice of the optimal PIVC for the right patient for the right  
7  
8 therapy, site selection and preparation, insertion technology, maintenance care  
9  
10 bundles, stabilization materials and dressings<sup>3-5,16</sup>. Recent evidence from large scale  
11  
12 studies in neonatal populations regarding factors influencing PIVC is lacking and  
13  
14 absent for Middle Eastern settings and contexts. The current study aims to identify and  
15  
16 evaluate the relationships between unmodifiable and potentially modifiable factors with  
17  
18 the presence of PIVC related complications.  
19  
20  
21  
22  
23  
24  
25  
26  
27  
28  
29  
30  
31  
32  
33  
34  
35  
36  
37  
38  
39  
40  
41  
42  
43  
44  
45  
46  
47  
48  
49  
50  
51  
52  
53  
54  
55  
56  
57  
58  
59  
60

## METHODS

### Design and setting

This retrospective observational study uses routinely collected anonymized data from January 2019 to July 2020. The outcome of the study was the occurrence of any complication in relation to PIVC use, leading to unplanned removal of the device before completion of the intended intravenous therapy. The study was carried out on the NICU (112 cots) of the Women's Wellness and Research Centre (WWRC) of Hamad Medical Corporation (HMC), Doha, Qatar.

### Participants and sample size

Infants who were admitted to the NICU and who required intravenous therapy were included in this study. Participants were excluded from the sample if the data collection was incomplete or related to the use of other devices (centrally inserted central catheters or peripherally inserted central catheters).

### Procedure

Peripheral intravenous cannulation was performed according to hospital policy based on international guidelines<sup>17</sup>. In the study setting, peripheral intravenous cannulation is routinely performed by nurses from the NICU vascular access team (VAT). Proactive

1  
2  
3 choices to prevent patients from running out of veins and being labeled as a difficult  
4  
5  
6 vascular access patient are key in the selection of cannulation site and intravenous  
7  
8 catheter<sup>7</sup>. For that reason, saphenous and elbow veins generally are avoided for  
9  
10  
11 cannulation<sup>17</sup>. The selection of suitable veins was done using the VeinViewer®  
12  
13 (Christie Medical Holdings Inc., Lake Mary, FL, USA). Vein length, valves, and potential  
14  
15 for the vein to fill and empty itself were prior assessed using a standardized approach  
16  
17 to appraisal of the potential site. Short peripheral intravenous catheters were used if  
18  
19 therapy was predicted for up to two days, including a 26 or 24-gauge Neoflon™ Pro  
20  
21 (Becton Dickinson Infusion Therapy, Sandy, UT, USA) or a 26-gauge SuperCath™  
22  
23 Safety (ICU Medical, San Clemente, CA, USA). Extended 22-gauge peripheral  
24  
25 intravenous catheters were inserted when duration of therapy was expected to last for  
26  
27 5 days (LeaderFlex, Vygon, Lansdale, PA, USA). In situations where intravenous  
28  
29 therapy was expected to last more than 5 days central venous access is preferred.  
30  
31  
32 According to hospital protocols, and based on international guidelines, there is no  
33  
34 evidence for routine rotation of vascular access devices in the neonatal population<sup>17</sup>.  
35  
36  
37  
38  
39  
40  
41  
42  
43  
44  
45

#### 46 **Measurements and data collection**

47  
48  
49 The main outcome was the occurrence of any peripheral intravenous cannulation  
50  
51 failure, leading to unplanned removal of the device before completion of the intended  
52  
53 intravenous therapy. Patient demographics and baseline data included sex, gestational  
54  
55 age at birth in weeks and days, birth weight, and current body weight in grams. Data  
56  
57 regarding the procedure of peripheral intravenous cannulation were the date and time  
58  
59  
60

1  
2  
3 of cannulation, as well as the number of attempts needed to successful cannulation,  
4  
5  
6 cannulation side (left or right), extremity of cannulation and the site on the extremity  
7  
8 (dorsum of the hand, wrist and lower arm, elbow crease and upper arm, foot, ankle  
9  
10 and lower leg, or knee and upper leg), size of device (22, 24, or 26 gauge), the  
11  
12 indication for intravenous treatment (intravenous fluids, medications, total parenteral  
13  
14 nutrition, blood and blood products, blood extraction, or procedural), the date and time  
15  
16 of removal of the PIVC, total dwell time of the PIVC in hours (calculated as the removal  
17  
18 date and time minus the insertion date and time), and the reason for removal of the  
19  
20 PIVC (therapy completed and elective removal, PIVIE, phlebitis, occlusion,  
21  
22 dislodgement and accidental removal, discoloration, patient transferred or expired).  
23  
24 Furthermore, additional data points included the use of catheter securement glue,  
25  
26 application of ivWatch® (ivWatch LLC., Newport News, VA, USA), if the touch-look-  
27  
28 compare observation tool was used, and calculation of the PIVIE Severity Score in  
29  
30 percentages<sup>18,19</sup>. The ivWatch® was introduced into use in January 2020 and applied  
31  
32 since then with infants weighing more than 1000 grams.  
33  
34  
35  
36  
37  
38  
39  
40  
41  
42  
43  
44  
45

## 46 **Statistical analyses**

47  
48  
49 Descriptive statistics were used to summarize the outcomes with a mean and its  
50  
51 standard deviation or median and its range for continuous variables regarding its  
52  
53 normal distribution, and absolute numbers with percentage for discrete variables. The  
54  
55 assumption of normal distribution was proved with Kolmogorov-Smirnof testing.  
56  
57 Differences regarding outcomes and measurements were demonstrated by using the  
58  
59  
60

1  
2  
3  $\chi^2$ -test, Mann-Whitney  $U$  test, or unpaired samples  $t$  test, as appropriate. Stepwise  
4  
5  
6 Cox' hazard regression analyses were used to provide correlations between variables  
7  
8 regarding the outcome of this study and obtain its odds ratio with 95% confidence  
9  
10 interval. Items with a significant relationship ( $P<0.01$ ) to the outcome of this study from  
11  
12 a univariate analysis were entered in these analyses. The stepwise method was  
13  
14 utilized to remove independent variables that did not make a significant contribution to  
15  
16 the primary outcome variable using a backward elimination process based on the Wald  
17  
18 statistic and level of significance, with the removal criteria set at  $P=0.01$ , to obtain a  
19  
20 model with a minimal set of variables. Correlation between variables was measured by  
21  
22 determining Pearson's or Spearman's  $\rho$ , as appropriate. Survival analyses of PIVC in  
23  
24 terms of its dwell time were performed by plotting a Kaplan-Meier curve. Differences  
25  
26 between survival time of the PIVC according to its reason for premature removal were  
27  
28 represented with Log Rank (Mantel-Cox)  $\chi^2$ . In addition, Log Rank (Mantel-Cox)  $\chi^2$   
29  
30 analyses were used for all comparisons regarding the different outcome measures on  
31  
32 device dwell-time. A  $P<0.05$  was denoted to be statistically significant throughout this  
33  
34 study. SPSS (version 25.0; SPSS Inc., Chicago, IL, USA) was used for statistical  
35  
36 analyses.  
37  
38  
39  
40  
41  
42  
43  
44  
45  
46  
47  
48  
49  
50

### 51 **Ethics approval statement**

52  
53  
54 The study protocol (MRC-01-20-594) was approved by the local institution review body  
55  
56 (IRB). As the data source was anonymized, the local IRB deemed that participant  
57  
58 consent was not feasible nor required as they determined the study a 'chart review'.  
59  
60



1  
2  
3  
4 Participants and their parents were not involved in the design, conduct or reporting of  
5  
6 this study.  
7  
8  
9  
10

## 11 Patient and public involvement

12  
13  
14  
15 Study outcome measurements were based on recent literature and after a brainstorm  
16  
17 session with the researchers. The study did not involve any patient nor member of the  
18  
19 public in the conception, design and development of the study protocol. They were not  
20  
21 also involved in data acquisition, analyses, interpretation and development of this  
22  
23 manuscript.  
24  
25  
26  
27  
28  
29  
30  
31  
32  
33  
34  
35  
36  
37  
38  
39  
40  
41  
42  
43  
44  
45  
46  
47  
48  
49  
50  
51  
52  
53  
54  
55  
56  
57  
58  
59  
60

## RESULTS

In total, data on 15087 cannulation events in neonates was collected during the study period, of which data of 2109 participants were removed due to incompleteness, including failure to insert. The final database included 12978 participants, with 7695 (59%) being of male sex. Mean gestational age was 34+6 (23 to 43) weeks. Current age in days after birth was 9 (0 to 29) days at the time that peripheral intravenous cannulation was performed. Mean weight at birth was 2334 ±975 grams, with a mean current weight of 2410 ±931 grams at the time of cannulation.

Successful peripheral intravenous cannulation at the first attempt was obtained in 8481 participants (65%). 24% needed two attempts, 8%, 2% needed three attempts and a small number, under senior clinician oversight needed more attempts to successfully insert a PIVC. Throughout the study were 19329 insertion attempts performed to create peripheral intravenous access. Data regarding the procedure of peripheral intravenous cannulation is summarized in Table 1.

Failure of the PIVC, resulting in premature removal, occurred in 7627 participants (59%). In 5145 participants (40%), the PIVC was removed after completion of intravenous therapy. In 142 cases (1%) was the participant transferred or expired (administrative censoring). A mean dwell time of 36 ±28 hours was recorded in participants with no complications, whereas the mean dwell time was 31 ±23 hours in participants with an indication for premature removal of the PIVC ( $P<0.001$ ,

1  
2  
3  
4  $\chi^2=5850.77$ ,  $df=1$ ). Subsequently, there was a correlation between dwell times and the  
5  
6 occurrence of a PIVC related complication ( $P<0.001$ ,  $\rho=-0.099$ ). The overall PIVC  
7  
8 complication rate was 18 per 1000 catheter days. PIVIE was the most frequently  
9  
10 observed complication throughout the studied cohort, with a relative risk for device  
11  
12 failure of 3.14 (3.04 to 3.25). Additional information according to the reason for removal  
13  
14 of the PIVC is shown in Table 2.  
15  
16  
17

18  
19 Total dwell time of the device in each participant until its moment of removal is  
20  
21 represented in Figure 1. 50% of PIVC were removed within the first 38 hours. Dwell  
22  
23 times differed regarding the reason for removal or the kind of PIVC related complication  
24  
25 ( $P<0.001$ ,  $\chi^2=76.83$ ,  $df=4$ ).  
26  
27  
28

29  
30 As shown in Table 3, twelve variables had a significant relation with the outcome of  
31  
32 interest in the univariate logistic analyses, resulting in premature removal of the device.  
33  
34 These items were used for multivariate analyses, resulting in a smallest set of five  
35  
36 variables correlating with the outcome of this study (Table 4).  
37  
38  
39

40  
41 A lower weight at birth (hazard ratio =0.23, 0.20 to 0.28,  $P<0.001$ ) and a lower current  
42  
43 body weight (hazard ratio =1.06, 1.03 to 1.10,  $P=0.018$ ) resulted in an increased risk  
44  
45 for PIVC related complications. Cannulation on the hand showed the lowest  
46  
47 complication rate (57%), whereas most complications were reported after cannulation  
48  
49 on the ankle or lower leg (72%) ( $P<0.001$ ,  $\chi^2=112.65$ ,  $df=6$ ). Inserting a 22-gauged  
50  
51 device resulted in 77% of cases in a complication, cannulation with a 26-gauged  
52  
53 catheter led to complications in 49% of insertions ( $P=0.001$ ,  $\chi^2=17.04$ ,  $df=3$ ). If TPN  
54  
55 was the indication for starting up intravenous treatment, 64% resulted in premature  
56  
57  
58  
59  
60

1  
2  
3 removal of the device, whereas only 18% of insertion resulted in a complication if  
4  
5  
6 cannulation was performed per procedure and elective ( $P<0.001$ ,  $\chi^2=288.33$ ,  $df=4$ ).  
7  
8 Cannulation site (hazard ratio =1.23, 1.16 to 1.30,  $P<0.001$ ), the inserted device  
9  
10 (hazard ratio =0.89, 0.84 to 0.94,  $P<0.001$ ) and the indication for intravenous treatment  
11  
12 (hazard ratio =0.76, 0.73 to 0.79,  $P<0.001$ ) were modifiable factors.  
13  
14  
15

16  
17 The PIVIE Severity Score was higher in participants with an indication for premature  
18  
19 removal of the device ( $13.1 \pm 8.6$ ) when compared to those without a VAD related  
20  
21 complication ( $0.8 \pm 4.1$ ) ( $P<0.001$ ,  $t=-25.409$ ). PIVIE Severity Scores were increased  
22  
23 in participants suffering from PIVIE ( $13.8 \pm 8.0$ ) and phlebitis ( $12.9 \pm 9.9$ ). Furthermore,  
24  
25 a correlation between the PIVIE Severity Score and device dwell time could be  
26  
27 obtained ( $P<0.001$ ,  $\rho=-0.122$ ). The ivWatch® was applied in 12% of participants, of  
28  
29 which 63% suffered from premature removal. The added value of this device resulted  
30  
31 in a sensitivity of 57% and a specificity of 56% ( $P<0.001$ ,  $\chi^2=54.165$ ,  $df=1$ ). Catheter  
32  
33 dwell times of  $38 \pm 26$  were seen after the application of ivWatch®, which did not differ  
34  
35 from dwell times of  $31 \pm 25$  in participants in whom the technique was not used  
36  
37 ( $P<0.001$ ,  $\chi^2=45.31$ ,  $df=1$ ). Despite, a correlation between the application of the  
38  
39 ivWatch® and device dwell times could not be obtained ( $P=0.705$ ,  $\rho=-0.006$ ). The  
40  
41 touch-look-compare observation tool was applied in 67% of cases and detected  
42  
43 complications in 61% of participants with an event ( $P=0.002$ ,  $\chi^2=9.975$ ,  $df=1$ ). The use  
44  
45 of the touch-look-compare observation tool resulted in a sensitivity of 97% and a  
46  
47 specificity of 96% and correlated with device dwell time ( $P=0.001$ ,  $\rho=-0.032$ ). The use  
48  
49 of glue for fixation of the PIVC increased the dwell time to  $34 \pm 25$  when compared to  
50  
51  
52  
53  
54  
55  
56  
57  
58  
59  
60

1  
2  
3 participants in which no glue was used (dwell time of  $28 \pm 18$ ), although the difference  
4  
5 was not significant ( $P=0.623$ ,  $\chi^2=0.24$ ,  $df=1$ ). A correlation could not be seen between  
6  
7 the use of glue and PIVC dwell times ( $P=0.025$ ,  $\rho=-0.106$ ).  
8  
9  
10  
11  
12  
13  
14  
15  
16  
17  
18  
19  
20  
21  
22  
23  
24  
25  
26  
27  
28  
29  
30  
31  
32  
33  
34  
35  
36  
37  
38  
39  
40  
41  
42  
43  
44  
45  
46  
47  
48  
49  
50  
51  
52  
53  
54  
55  
56  
57  
58  
59  
60

For peer review only

## DISCUSSION

The incidence of VAD failure is high in clinical practice, which negatively affects a neonate's comfort and outcome<sup>20,21</sup>. Failure of peripheral inserted PIVC, resulting in premature removal, occurred in 51% of participants, with a complication rate of 18 per 1000 device days. The most frequently reported complications were PIVIE and phlebitis. The risk for complications was increased in participants with a lower weight at birth and current body weight. Furthermore, the cannulation site, size and type of device, and the indication for intravenous treatment affected the risk for failure as well.

Although this study provides information on the risk of complications regarding peripheral intravenous cannulation in neonates, majority of it was reported in many articles. Nonetheless, to the best of our knowledge, a study including as many patients as the current study does was never published before on this topic.

Peripheral intravenous catheters are often the primary and most commonly inserted devices used to obtain vascular access during hospitalization<sup>20</sup>. The incidence of device failure in the current study is slightly higher when compared to the 34% pooled incidence of failure in the recently published meta-analyses by Indarwati et al.<sup>22</sup>. It is difficult to give an unambiguous clarification for this, although the pattern of complications and their relative incidence does match.

PIVIE was the most common complication in infants admitted to the NICU, with an incidence of 34% in the current study. PIVIE is defined as an unintended infusion of

1  
2  
3 fluids and/or medication in the surrounding tissue, in which infiltration is the infusion of  
4  
5 non-vesicant fluids or medication and extravasation infusion of vesicants into  
6  
7 surrounding tissues<sup>5</sup>. The determination of PIVIE can be subjective, making it hard to  
8  
9 compare the results of different studies. However, standardized training of a dedicated  
10  
11 VAT and routine review of scores can improve consensus and reduce subjectivity. The  
12  
13 incidence of infiltration reported elsewhere ranges from 6% to 87%, and the incidence  
14  
15 of extravasation between 2% and 77%<sup>22</sup>. The use of the infiltration/extravasation  
16  
17 staging instrument, as developed by Montgomery et al.<sup>23</sup>, could accomplish consensus  
18  
19 on the definition of the condition and its severity<sup>5</sup>. An explanation for the non-standard  
20  
21 use of this instrument may be that it has not been externally validated.  
22  
23  
24  
25  
26  
27  
28  
29

30 Phlebitis (inflammation of the venous wall) can cause discomfort and tissue damage.  
31  
32 The incidence was 10% in the current study which is broadly in accord with other  
33  
34 reports<sup>22-27</sup>. According to Arias-Fernandez et al.<sup>28</sup>, assessment of phlebitis is difficult  
35  
36 because the consensus for the diagnosis is low. Furthermore, a lack of consensus on  
37  
38 phlebitis measures has likely contributed to disparities in reported phlebitis incidence<sup>29</sup>.  
39  
40  
41  
42  
43

44 Several tools are used in clinical practice to reduce the risk or severity for premature  
45  
46 failure of PIVCs due to device related complications. The touch-look-compare  
47  
48 observation tool was developed at Cincinnati Children's Hospital Medical Center to  
49  
50 reduce peripheral intravenous infiltration and extravasation injuries<sup>18</sup>. This  
51  
52 documented methodical hourly assessment of patients with a PIVC can help  
53  
54 practitioners' standardize their practice and reduce variations in quality of care<sup>18</sup>. Our  
55  
56 study showed highly discriminative effects of the touch-look-compare observation tool  
57  
58  
59  
60

1  
2  
3 based on high sensitivity and specificity, which was denoted as the most decisive tool  
4  
5  
6 in detecting device related complications in earlier. Routine observations by combining  
7  
8 the touch-look-compare observation tool and the PIVIE Severity Scoring instrument  
9  
10  
11 seems to result in the most optimal situation regarding the early detection of  
12  
13  
14 complications.  
15

16  
17 It is known that the preferred cannulation site is the dorsal hand, on which fewer  
18  
19 attempts were required for successful cannulation, with fewer complications and  
20  
21 extended dwell times<sup>14</sup>. This is in accordance with the results of the current study.  
22  
23  
24 Moreover, phlebitis caused by mechanical irritation due to the device is thought to be  
25  
26 an important factor for failure<sup>21</sup>. Fixation of the device after insertion with glue increases  
27  
28 the stability of the device. Despite no significance could be obtained, dwell times were  
29  
30 increased after using glue in this study. Highest incidence of premature removal of the  
31  
32 device was seen with a 22-gauged device. Insertion of a 26-gauged catheter resulted  
33  
34 in the lowest incidence of complications. Notwithstanding, most participants in this  
35  
36 study received a 26-gauged device, possibly leading to a distorting result. To minimize  
37  
38 the risk for phlebitis, the smallest gauged catheter possible should be inserted and the  
39  
40 use of extension tubes as an accessory to the device should be avoided<sup>27</sup>.  
41  
42  
43  
44  
45  
46  
47  
48

49 Preterm infants are extra sensitive to the development of PIVIE and phlebitis due to  
50  
51 their immature immune systems<sup>22,30</sup>. Beall et al.<sup>30</sup> concluded that the inadequate anti-  
52  
53 inflammatory response may fail to release free radical scavengers leading to  
54  
55 endothelial apoptosis and injury of cell membranes and vessels. To add to this, it is  
56  
57 thought that medications or fluids with a higher osmolality increases the risk for  
58  
59  
60



1  
2  
3  
4 extravasation by irritating the endothelial lining of the vein<sup>22</sup>. Early detection of signs  
5  
6 and symptoms correlating positively with PIVC complications is crucial in limiting the  
7  
8 risk for failure of the device. Assessing pain accurately in preverbal infants is  
9  
10 challenging<sup>31</sup>. Moreover, additional occlusive fixtures and bandages to secure the  
11  
12 device add limits to identifying early stages of complications, and thus timely cessation  
13  
14 of therapy and treatment to minimize harm<sup>22,31</sup>. The incidence of complications could  
15  
16 likely be reduced with consistent and quality insertion and maintenance practices. The  
17  
18 Infusion Nurses Society provides specific recommendations for newborn infants  
19  
20 offering further specific guidelines for insertion and management practice<sup>17</sup>.  
21  
22  
23  
24  
25  
26  
27  
28  
29

### 30 **Limitations**

31  
32  
33 The current study was based on a retrospective collected dataset. In contrast to  
34  
35 randomized studies, the method creates a risk for selection bias. In the present study  
36  
37 every infant with a PIVC was included in order to minimize the risk of selection bias. In  
38  
39 addition, this current study was carried out according to the STROBE statement<sup>32</sup>.  
40  
41  
42 Inter-rater variability might have affected the results, however, our use of standardized  
43  
44 education and training and limiting vascular access to a small team (the VAT) will  
45  
46 mitigate this variability in the data. Nonetheless, future research should focus on the  
47  
48 development and validation of decisive tools and their integration with emerging  
49  
50 technologies to identify complications early.  
51  
52  
53  
54  
55  
56  
57  
58  
59  
60

## CONCLUSION AND RELEVANT IMPLICATIONS

Most infants experienced a vascular access related complication. Five variables were identified as factors affecting PIVC dwell time in patients admitted to the NICU. These factors include a lower weight at birth and current body weight, the cannulation site, size and type of device and the indication for intravenous treatment affected the risk for failure as well. The PIVC complication rate was 18 per 1000 catheter days in the current study. The risk for the development of a PIVC related complication, leading to premature removal of the device, increased with extended dwell times. It seems that when a PIVC is inserted it is not the question of if the infant will have a complication, but only a matter of when. The most frequently observed complication in the neonatal population is a PIVIE, with a relative risk of 3.14 (3.04 to 3.25). Consequently, we argue that PIVC should be used judiciously, and thought given prior to their use as to whether alternate means of IV access might be more appropriate.

## ADDITIONAL INFORMATION

**Conflicts of interest disclosures:** The authors declared no potential conflicts of interest with respect to the research, authorship, and/or publication of this article.

**Funding:** The authors received no financial support for the research or authorship. The local IRB made funds available to support open publication of this article.

**Data sharing statement:** De-identified individual participant data will not be made available.

**Acknowledgements:** The authors would like to thank the NICU's vascular access team and all our other colleagues in the NICU of WWRC.

**Contributor's statement:** Matheus F.P.T. van Rens was the main investigator, conceptualized and designed the study, coordinated and supervised data collection, drafted the initial manuscript, and reviewed and revised the manuscript. Kevin Hugill drafted the initial manuscript, and reviewed and revised the manuscript. Mohamad A. Mahmah critically reviewed the manuscript for important intellectual content. Mohammad A.A. Bayoumi reviewed and revised the manuscript. Airene L.V. Francia

1  
2  
3 designed the data collection instruments, collected data, and reviewed and revised the  
4  
5  
6 manuscript. Krishna L.P. Garcia designed the data collection instruments, collected  
7  
8 data, and reviewed and revised the manuscript. Fredericus H.J. van Loon  
9  
10  
11 conceptualized and designed the study, carried out the initial analyses, and critically  
12  
13  
14 reviewed the manuscript for important intellectual content and revised the manuscript.  
15  
16  
17  
18  
19  
20  
21  
22  
23  
24  
25  
26  
27  
28  
29  
30  
31  
32  
33  
34  
35  
36  
37  
38  
39  
40  
41  
42  
43  
44  
45  
46  
47  
48  
49  
50  
51  
52  
53  
54  
55  
56  
57  
58  
59  
60

For peer review only

## REFERENCES

1. Legemaat M, Carr PJ, van Rens RM, van Dijk M, Poslawsky IE, van den Hoogen A. Peripheral intravenous cannulation: complication rates in the neonatal population: a multicenter observational study. *J Vasc Access*. 2016;17(4):360-365. doi:10.5301/jva.5000558
2. Ainsworth S, McGuire W. Percutaneous central venous catheters versus peripheral cannulae for delivery of parenteral nutrition in neonates. *Cochrane database Syst Rev*. 2015;(10):CD004219. doi:10.1002/14651858.CD004219.pub4
3. Chenoweth KB, Guo J-W, Chan B. The Extended Dwell Peripheral Intravenous Catheter Is an Alternative Method of NICU Intravenous Access. *Adv neonatal care Off J Natl Assoc Neonatal Nurses*. 2018;18(4):295-301. doi:10.1097/ANC.0000000000000515
4. Odom B, Lowe L, Yates C. Peripheral Infiltration and Extravasation Injury Methodology: A Retrospective Study. *J Infus Nurs Off Publ Infus Nurses Soc*. 2018;41(4):247-252. doi:10.1097/NAN.0000000000000287

- 1  
2  
3 5. Atay S, Sen S, Cukurlu D. Incidence of infiltration/extravasation in newborns  
4  
5  
6  
7 using peripheral venous catheter and affecting factors. *Rev Esc Enferm USP*.  
8  
9  
10 2018;52:e03360. doi:10.1590/S1980-220X2017040103360  
11  
12  
13
- 14 6. Unbeck M, Förberg U, Ygge B-M, Ehrenberg A, Petzold M, Johansson E.  
15  
16  
17  
18 Peripheral venous catheter related complications are common among paediatric  
19  
20  
21 and neonatal patients. *Acta Paediatr*. 2015;104(6):566-574.  
22  
23  
24  
25 doi:10.1111/apa.12963  
26  
27
- 28 7. Steere L, Ficara C, Davis M, Moureau N. Reaching One Peripheral Intravenous  
29  
30  
31  
32 Catheter (PIVC) Per Patient Visit With Lean Multimodal Strategy: the PIV5Rights  
33  
34  
35  
36 <sup>TM</sup> Bundle . *J Assoc Vasc Access*. 2019;24(3):31-43.  
37  
38  
39  
40  
41  
42  
43  
44  
45  
46  
47  
48  
49  
50  
51  
52  
53  
54  
55  
56  
57  
58  
59  
60  
60  
doi:10.2309/j.java.2019.003.004
8. Patregnani JT, Sochet AA, Klugman D. Short-Term Peripheral Vasoactive  
61  
62  
63  
64  
65  
66  
67  
68  
69  
70  
71  
72  
73  
74  
75  
76  
77  
78  
79  
80  
81  
82  
83  
84  
85  
86  
87  
88  
89  
90  
91  
92  
93  
94  
95  
96  
97  
98  
99  
100  
Infusions in Pediatrics: Where Is the Harm? *Pediatr Crit care Med a J Soc Crit  
Care Med World Fed Pediatr Intensive Crit Care Soc*. 2017;18(8):e378-e381.  
doi:10.1097/PCC.0000000000001230
9. Danski MTR, Mingorance P, Johann DA, Vayego SA, Lind J. [Incidence of local

- 1  
2  
3 complications and risk factors associated with peripheral intravenous catheter  
4  
5  
6  
7 in neonates]. *Rev Esc Enferm USP*. 2016;50(1):22-28. doi:10.1590/S0080-  
8  
9  
10 623420160000100003  
11  
12  
13  
14 10. Boyar V, Galiczewski C, Kurepa D. Point-of-Care Ultrasound Use in Neonatal  
15  
16  
17  
18 Peripheral Intravenous Extravasation Injuries: A Case Series. *J wound, ostomy,*  
19  
20  
21 *Cont Nurs Off Publ Wound, Ostomy Cont Nurses Soc*. 2018;45(6):503-509.  
22  
23  
24  
25 doi:10.1097/WON.0000000000000475  
26  
27  
28  
29 11. Desarno J, Sandate I, Green K, Chavez P. When in Doubt, Pull the Catheter  
30  
31  
32  
33 Out: Implementation of an Evidence-Based Protocol in the Prevention and  
34  
35  
36 Management of Peripheral Intravenous Infiltration/Extravasation in Neonates.  
37  
38  
39 *Neonatal Netw*. 2018;37(6):372-377. doi:10.1891/0730-0832.37.6.372  
40  
41  
42  
43 12. Ohki Y, Maruyama K, Harigaya A, Kohno M, Arakawa H. Complications of  
44  
45  
46  
47 peripherally inserted central venous catheter in Japanese neonatal intensive  
48  
49  
50 care units. *Pediatr Int*. 2013;55(2):185-189. doi:10.1111/ped.12033  
51  
52  
53  
54 13. Pettit J. Assessment of the infant with a peripheral intravenous device. *Adv*  
55  
56  
57  
58 *neonatal care Off J Natl Assoc Neonatal Nurses*. 2003;3(5):230-240.  
59  
60

- 1  
2  
3  
4 14. Monasor-Ortolá D, Cortés-Castell E, Martínez-Pascual C, Esteve-Ríos A, Rizo-  
5  
6  
7 Baeza MM. Factors Influencing the Success of Peripheral Venous Access in  
8  
9  
10 Neonates. *J Pediatr Nurs*. 2019;47:e30-e35. doi:10.1016/j.pedn.2019.04.017  
11  
12  
13  
14 15. Wu J, Mu D. Vascular catheter-related complications in newborns. *J Paediatr*  
15  
16  
17 *Child Health*. 2012;48(2):E91-5. doi:10.1111/j.1440-1754.2010.01934.x  
18  
19  
20  
21  
22 16. Rickard CM, Marsh NM, Webster J, et al. Intravascular device administration  
23  
24  
25 sets: replacement after standard versus prolonged use in hospitalised patients-a  
26  
27  
28 study protocol for a randomised controlled trial (The RSVP Trial). *BMJ Open*.  
29  
30  
31 2015;5(2):e007257. doi:10.1136/bmjopen-2014-007257  
32  
33  
34  
35  
36 17. Gorski LA, Hadaway L, Hagle ME, et al. Infusion Therapy Standards of Practice,  
37  
38  
39 8th Edition. *J Infus Nurs Off Publ Infus Nurses Soc*. 2021;44(1S Suppl 1):S1-  
40  
41  
42 S224. doi:10.1097/NAN.0000000000000396  
43  
44  
45  
46  
47 18. Tofani BF, Rineair SA, Gosdin CH, et al. Quality improvement project to reduce  
48  
49  
50 infiltration and extravasation events in a pediatric hospital. *J Pediatr Nurs*.  
51  
52  
53 2012;27(6):682-689. doi:10.1016/j.pedn.2012.01.005  
54  
55  
56  
57  
58 19. Doellman D, Hadaway L, Bowe-Geddes LA, et al. Infiltration and extravasation:  
59  
60



- 1  
2  
3 update on prevention and management. *J Infus Nurs Off Publ Infus Nurses Soc.*  
4  
5  
6  
7 2009;32(4):203-211. doi:10.1097/NAN.0b013e3181aac042  
8  
9  
10  
11 20. Alexandrou E, Ray-Barruel G, Carr PJ, et al. Use of Short Peripheral Intravenous  
12  
13 Catheters: Characteristics, Management, and Outcomes Worldwide. *J Hosp*  
14  
15  
16  
17  
18 *Med.* 2018;13(5). doi:10.12788/jhm.3039  
19  
20  
21  
22 21. Takahashi T, Murayama R, Abe-Doi M, et al. Preventing peripheral intravenous  
23  
24 catheter failure by reducing mechanical irritation. *Sci Rep.* 2020;10(1):1550.  
25  
26  
27  
28  
29 doi:10.1038/s41598-019-56873-2  
30  
31  
32  
33 22. Indarwati F, Mathew S, Munday J, Keogh S. Incidence of peripheral intravenous  
34  
35 catheter failure and complications in paediatric patients: Systematic review and  
36  
37  
38  
39 meta analysis. *Int J Nurs Stud.* 2020;102:103488.  
40  
41  
42  
43 doi:10.1016/j.ijnurstu.2019.103488  
44  
45  
46  
47 23. Montgomery LA, Hanrahan K, Kottman K, Otto A, Barrett T, Hermiston B.  
48  
49  
50  
51  
52  
53  
54  
55  
56  
57  
58  
59  
60  
60  
24. Padilla-Sánchez C, Montejano-Lozoya R, Benavent-Taengua L, et al. Risk

- 1  
2  
3 factors associated with adverse events in neonates with peripherally inserted  
4  
5  
6  
7 central catheter. *Enferm intensiva*. 2019;30(4):170-180.  
8  
9  
10  
11 doi:10.1016/j.enfi.2018.10.006  
12  
13  
14  
15 25. Cho Y-H, Yen L-L, Yu K-L, Chang C-C, Chen H-L. [Reducing the Incidence of  
16  
17  
18 Phlebitis Related to Intravenous Injection in Pediatric Patients]. *Hu Li Za Zhi*.  
19  
20  
21 2015;62(3 Suppl):49-57. doi:10.6224/JN.62.3S.49  
22  
23  
24  
25 26. Mihala G, Ray-Barruel G, Chopra V, et al. Phlebitis Signs and Symptoms With  
26  
27  
28  
29  
30  
31  
32  
33  
34  
35  
36  
37  
38  
39  
40  
41  
42  
43  
44  
45  
46  
47  
48  
49  
50  
51  
52  
53  
54  
55  
56  
57  
58  
59  
60
- Peripheral Intravenous Catheters: Incidence and Correlation Study. *J Infus Nurs*  
*Off Publ Infus Nurses Soc*. 2018;41(4):260-263.  
doi:10.1097/NAN.000000000000288
27. Sharp R, Cummings M, Childs J, et al. Measurement of Vein Diameter for  
Peripherally Inserted Central Catheter (PICC) Insertion: An Observational Study.  
*J Infus Nurs*. 2015;38(5):351-357. doi:10.1097/NAN.000000000000125
28. Arias-Fernández L, Suárez-Mier B, Martínez-Ortega MDC, Lana A. Incidence  
and risk factors of phlebitis associated to peripheral intravenous catheters.  
*Enferm Clin*. 2017;27(2):79-86. doi:10.1016/j.enfcli.2016.07.008

- 1  
2  
3  
4  
5  
6  
7  
8  
9  
10  
11  
12  
13  
14  
15  
16  
17  
18  
19  
20  
21  
22  
23  
24  
25  
26  
27  
28  
29  
30  
31  
32  
33  
34  
35  
36  
37  
38  
39  
40  
41  
42  
43  
44  
45  
46  
47  
48  
49  
50  
51  
52  
53  
54  
55  
56  
57  
58  
59  
60
29. Ray-Barruel G, Polit DF, Murfield JE, Rickard CM. Infusion phlebitis assessment measures: a systematic review. *J Eval Clin Pract.* 2014;20(2):191-202. doi:10.1111/jep.12107
30. Beall V, Hall B, Mulholland JT, Gephart SM. Neonatal Extravasation: An Overview and Algorithm for Evidence-based Treatment. *Newborn Infant Nurs Rev.* 2013;13(4):189-195. doi:https://doi.org/10.1053/j.nainr.2013.09.001
31. Sangam SL. Quality improvement measures for early detection of severe intravenous infiltration in infants. *BMJ open Qual.* 2019;8(2):e000407. doi:10.1136/bmjopen-2018-000407
32. von Elm E, Altman DG, Egger M, Pocock SJ, Gotsche PC, Vandenbroucke JP. The Strengthening the Reporting of Observational Studies in Epidemiology (STROBE) statement: guidelines for reporting observational studies. *Lancet (London, England).* 2007;370(9596):1453-1457. doi:10.1016/S0140-6736(07)61602-X

Table 1: Procedural peripheral intravenous cannulation data

| Factor                                           | Description                     | Total cohort<br><i>N</i> = 12978 | Successful first<br>attempt<br><i>N</i> = 8481 | Unsuccessful<br>first attempt<br><i>N</i> = 4497 | <i>P</i> -value |
|--------------------------------------------------|---------------------------------|----------------------------------|------------------------------------------------|--------------------------------------------------|-----------------|
| Side of cannulation                              | <i>Left</i>                     | 7120 (55%)                       | 4794 (57%)                                     | 2326 (52%)                                       | <0.001          |
|                                                  | <i>Right</i>                    | 5854 (45%)                       | 3684 (43%)                                     | 2170 (48%)                                       |                 |
| Site of cannulation on the<br>selected extremity | <i>Hand</i>                     | 10512 (81%)                      | 7078 (83%)                                     | 3434 (76%)                                       | <0.001          |
|                                                  | <i>Wrist/ lower arm</i>         | 459 (4%)                         | 240 (3%)                                       | 219 (5%)                                         |                 |
|                                                  | <i>Elbow/ upper arm</i>         | 61 (<1%)                         | 33 (1%)                                        | 28 (1%)                                          |                 |
|                                                  | <i>Foot</i>                     | 1774 (14%)                       | 1025 (12%)                                     | 749 (17%)                                        |                 |
|                                                  | <i>Ankle/ lower leg</i>         | 119 (1%)                         | 78 (1%)                                        | 41 (1%)                                          |                 |
|                                                  | <i>Knee/ upper leg</i>          | 50 (<1%)                         | 25 (<1%)                                       | 25 (<1%)                                         |                 |
| Size of the inserted<br>catheter                 | <i>26 gauge</i>                 | 12403 (96%)                      | 8090 (96%)                                     | 4313 (96%)                                       | <0.001          |
|                                                  | <i>24 gauge</i>                 | 141 (1%)                         | 97 (1%)                                        | 44 (1%)                                          |                 |
|                                                  | <i>22 gauge</i>                 | 434 (3%)                         | 294 (3%)                                       | 140 (3%)                                         |                 |
| Indication for intravenous<br>treatment          | <i>IV fluids/ medications</i>   | 7283 (56%)                       | 4781 (56%)                                     | 2502 (56%)                                       | <0.001          |
|                                                  | <i>IV fluids/ TPN</i>           | 4330 (33%)                       | 2844 (34%)                                     | 1486 (33%)                                       |                 |
|                                                  | <i>Blood and blood products</i> | 482 (4%)                         | 285 (3%)                                       | 197 (4%)                                         |                 |
|                                                  | <i>Blood extraction</i>         | 708 (5%)                         | 455 (5%)                                       | 253 (6%)                                         |                 |

---

| <i>Procedure</i> | 175 (2%) | 116 (2%) | 59 (1%) |
|------------------|----------|----------|---------|
|------------------|----------|----------|---------|

---

*Data is represented as absolute number and percentages, which were calculated as a proportion within in the cell. IV = intravenous, TPN = total parenteral nutrition.*

For peer review only

Table 2: Data representing the reason for removal of the peripheral intravenous catheter.

| Factor                        | Description                             | Device dwell time (hours) | Total cohort <i>N</i> = 12914 |
|-------------------------------|-----------------------------------------|---------------------------|-------------------------------|
| Reason for removal of the VAD | <i>Therapy completed/ elective</i>      | 36 ±28                    | 5145 (40%)                    |
|                               | <i>PIVIE</i>                            | 31 ±24                    | 5159 (40%)                    |
|                               | <i>Phlebitis</i>                        | 29 ±19                    | 1590 (12%)                    |
|                               | <i>Occlusion</i>                        | 41 ±29                    | 527 (4%)                      |
|                               | <i>Dislodgement/ accidental removal</i> | 23 ±25                    | 286 (2%)                      |
|                               | <i>Swelling or discoloration</i>        | 22 ±20                    | 65 (1%)                       |
|                               | <i>Administrative censoring</i>         | 17 ±26                    | 142 (1%)                      |

*Data is represented as mean and its standard deviation or as absolute number and percentages, which were calculated as a proportion within the cell. Device dwell time is represented in hours. VAD = vascular access device, PIVIE = peripheral intravenous intravasation and extravasation. Data of 64 participants is missing.*

**Table 3: Univariate Cox' hazard regression analyses with factors affecting the risk for failure of peripheral intravenous access devices.**

| Factor                                       | $\beta$ | Hazard ratio | 95% confidence interval | <i>P</i> value |
|----------------------------------------------|---------|--------------|-------------------------|----------------|
| Sex of the participant                       | 0.025   | 1.03         | 0.98 – 1.07             | 0.292          |
| Duration of gestation in weeks               | 0.014   | 0.98         | 0.98 – 0.99             | <0.001         |
| Current age in days since gestation          | 0.501   | 0.61         | 0.37 – 0.99             | 0.047          |
| Weight at birth in grams                     | 0.072   | 0.93         | 0.88 – 0.97             | 0.002          |
| Current weight in grams                      | 0.037   | 1.04         | 1.01 – 1.07             | 0.010          |
| Successful first attempt of cannulation      | 0.006   | 1.01         | 0.95 – 1.06             | 0.810          |
| Number of attempts to successful cannulation | 0.005   | 0.99         | 0.96 – 1.03             | 0.758          |
| Side of cannulation                          | 0.161   | 1.18         | 1.12 – 1.23             | <0.001         |
| Site of cannulation on the extremity         | 0.079   | 1.08         | 1.05 – 1.11             | <0.001         |
| Size of the inserted intravenous catheter    | 0.080   | 0.92         | 0.89 – 0.96             | <0.001         |
| Indication for intravenous treatment         | 0.292   | 0.75         | 0.72 – 0.78             | <0.001         |
| Time of the device in situ                   | 0.499   | 0.61         | 0.56 – 0.65             | <0.001         |
| Application of TLC observation               | 0.265   | 1.30         | 1.13 – 1.50             | <0.001         |
| PIVIE Severity Score                         | 0.023   | 1.02         | 1.01 – 1.03             | <0.001         |
| Application of the ivWatch®                  | 0.199   | 1.22         | 1.12 – 1.33             | <0.001         |

---

|                                     |       |      |             |       |
|-------------------------------------|-------|------|-------------|-------|
| Application of device fixation glue | 0.118 | 0.89 | 0.64 – 1.23 | 0.477 |
|-------------------------------------|-------|------|-------------|-------|

---

*TLC = touch-look-compare, PIVIE = peripheral intravenous infiltration and extravasation.*

For peer review only



Table 4: Multivariate Cox' hazard regression analyses with factors affecting the risk for failure of peripheral intravenous access devices.

| Factor                                    | $\beta$ | Hazard ratio | 95% confidence interval | <i>P</i> value |
|-------------------------------------------|---------|--------------|-------------------------|----------------|
| Weight at birth in grams                  | 1.452   | 0.23         | 0.20 – 0.28             | <0.001         |
| Current weight in grams                   | 0.062   | 1.06         | 1.03 – 1.10             | 0.018          |
| Site of cannulation on the extremity      | 0.207   | 1.23         | 1.16 – 1.30             | <0.001         |
| Size of the inserted intravenous catheter | 0.119   | 0.89         | 0.84 – 0.94             | <0.001         |
| Indication for intravenous treatment      | 0.280   | 0.76         | 0.73 – 0.79             | <0.001         |

1  
2  
3  
4 **Figure 1: Kaplan-Meier survival analyses for peripheral intravenous catheters.**  
5

6 *Intravenous catheters were removed after the occurrence of a complication, of which*  
7 *dwel times were compared between the type of complications as measured in this*  
8 *study. PIVIE = peripheral intravenous infiltration and extravasation.*  
9

10  
11 \* Figure was attached as separated file.  
12  
13  
14  
15  
16  
17  
18  
19  
20  
21  
22  
23  
24  
25  
26  
27  
28  
29  
30  
31  
32  
33  
34  
35  
36  
37  
38  
39  
40  
41  
42  
43  
44  
45  
46  
47  
48  
49  
50  
51  
52  
53  
54  
55  
56  
57  
58  
59  
60

For peer review only

Figure 1: Kaplan-Meier survival analyses for peripheral intravenous catheters.



*Intravenous catheters were removed after the occurrence of a complication, of which dwell times were compared between the type of complications as measured in this study. PIVIE = peripheral intravenous infiltration and extravasation.*

**STROBE 2007 (v4) Statement—Checklist of items that should be included in reports of cohort studies**

| Section/Topic                | Item # | Recommendation                                                                                                                                                                       | Reported on page # |
|------------------------------|--------|--------------------------------------------------------------------------------------------------------------------------------------------------------------------------------------|--------------------|
| <b>Title and abstract</b>    | 1      | (a) Indicate the study’s design with a commonly used term in the title or the abstract                                                                                               | 1                  |
|                              |        | (b) Provide in the abstract an informative and balanced summary of what was done and what was found                                                                                  | 2                  |
| <b>Introduction</b>          |        |                                                                                                                                                                                      |                    |
| Background/rationale         | 2      | Explain the scientific background and rationale for the investigation being reported                                                                                                 | 3                  |
| Objectives                   | 3      | State specific objectives, including any prespecified hypotheses                                                                                                                     | 3                  |
| <b>Methods</b>               |        |                                                                                                                                                                                      |                    |
| Study design                 | 4      | Present key elements of study design early in the paper                                                                                                                              | 4                  |
| Setting                      | 5      | Describe the setting, locations, and relevant dates, including periods of recruitment, exposure, follow-up, and data collection                                                      | 4                  |
| Participants                 | 6      | (a) Give the eligibility criteria, and the sources and methods of selection of participants. Describe methods of follow-up                                                           | 4                  |
|                              |        | (b) For matched studies, give matching criteria and number of exposed and unexposed                                                                                                  | 4                  |
| Variables                    | 7      | Clearly define all outcomes, exposures, predictors, potential confounders, and effect modifiers. Give diagnostic criteria, if applicable                                             | 5                  |
| Data sources/<br>measurement | 8*     | For each variable of interest, give sources of data and details of methods of assessment (measurement). Describe comparability of assessment methods if there is more than one group | 5                  |
| Bias                         | 9      | Describe any efforts to address potential sources of bias                                                                                                                            | 5                  |
| Study size                   | 10     | Explain how the study size was arrived at                                                                                                                                            | 5                  |
| Quantitative variables       | 11     | Explain how quantitative variables were handled in the analyses. If applicable, describe which groupings were chosen and why                                                         | 5                  |
| Statistical methods          | 12     | (a) Describe all statistical methods, including those used to control for confounding                                                                                                | 5,6                |
|                              |        | (b) Describe any methods used to examine subgroups and interactions                                                                                                                  | 5,6                |
|                              |        | (c) Explain how missing data were addressed                                                                                                                                          | 5,6                |
|                              |        | (d) If applicable, explain how loss to follow-up was addressed                                                                                                                       | 5,6                |
|                              |        | (e) Describe any sensitivity analyses                                                                                                                                                | 5,6                |
| <b>Results</b>               |        |                                                                                                                                                                                      |                    |

|                          |     |                                                                                                                                                                                                              |     |
|--------------------------|-----|--------------------------------------------------------------------------------------------------------------------------------------------------------------------------------------------------------------|-----|
| Participants             | 13* | (a) Report numbers of individuals at each stage of study—eg numbers potentially eligible, examined for eligibility, confirmed eligible, included in the study, completing follow-up, and analysed            | 7,8 |
|                          |     | (b) Give reasons for non-participation at each stage                                                                                                                                                         | 7,8 |
|                          |     | (c) Consider use of a flow diagram                                                                                                                                                                           | 7,8 |
| Descriptive data         | 14* | (a) Give characteristics of study participants (eg demographic, clinical, social) and information on exposures and potential confounders                                                                     | 7,8 |
|                          |     | (b) Indicate number of participants with missing data for each variable of interest                                                                                                                          | 7,8 |
|                          |     | (c) Summarise follow-up time (eg, average and total amount)                                                                                                                                                  | 7,8 |
| Outcome data             | 15* | Report numbers of outcome events or summary measures over time                                                                                                                                               | 7,8 |
| Main results             | 16  | (a) Give unadjusted estimates and, if applicable, confounder-adjusted estimates and their precision (eg, 95% confidence interval). Make clear which confounders were adjusted for and why they were included | 7,8 |
|                          |     | (b) Report category boundaries when continuous variables were categorized                                                                                                                                    | 7,8 |
|                          |     | (c) If relevant, consider translating estimates of relative risk into absolute risk for a meaningful time period                                                                                             | 7,8 |
| Other analyses           | 17  | Report other analyses done—eg analyses of subgroups and interactions, and sensitivity analyses                                                                                                               | 7,8 |
| <b>Discussion</b>        |     |                                                                                                                                                                                                              |     |
| Key results              | 18  | Summarise key results with reference to study objectives                                                                                                                                                     | 9   |
| <b>Limitations</b>       |     |                                                                                                                                                                                                              |     |
| Interpretation           | 20  | Give a cautious overall interpretation of results considering objectives, limitations, multiplicity of analyses, results from similar studies, and other relevant evidence                                   | 11  |
| Generalisability         | 21  | Discuss the generalisability (external validity) of the study results                                                                                                                                        | 11  |
| <b>Other information</b> |     |                                                                                                                                                                                                              |     |
| Funding                  | 22  | Give the source of funding and the role of the funders for the present study and, if applicable, for the original study on which the present article is based                                                | 13  |

\*Give information separately for cases and controls in case-control studies and, if applicable, for exposed and unexposed groups in cohort and cross-sectional studies.

**Note:** An Explanation and Elaboration article discusses each checklist item and gives methodological background and published examples of transparent reporting. The STROBE checklist is best used in conjunction with this article (freely available on the Web sites of PLoS Medicine at <http://www.plosmedicine.org/>, Annals of Internal Medicine at <http://www.annals.org/>, and Epidemiology at <http://www.epidem.com/>). Information on the STROBE Initiative is available at [www.strobe-statement.org](http://www.strobe-statement.org).
